# Supplementary material for: Biofillm: multicellular living of the unicellular bacteria
Source: Royal Society of Chemistry journal article supplement (doi:10.1039/d1cp02514g), 2012-01-01
Supplement: d1cp02514g4.pdf [file d1cp02514g4.pdf]

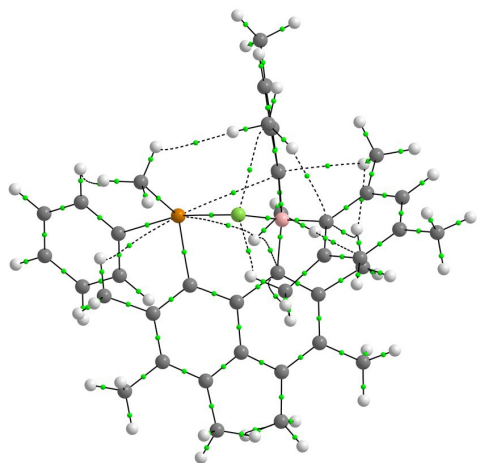

$4\text{CH}_3\cdots\text{F}^-$

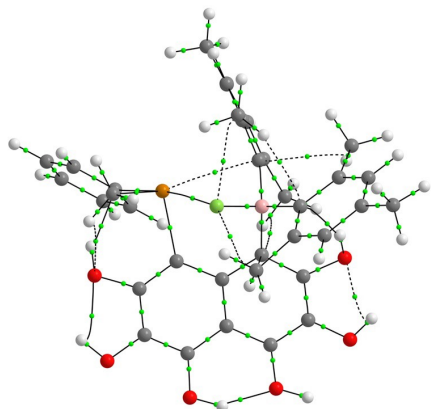

$4\text{OH}\cdots\text{F}^-$

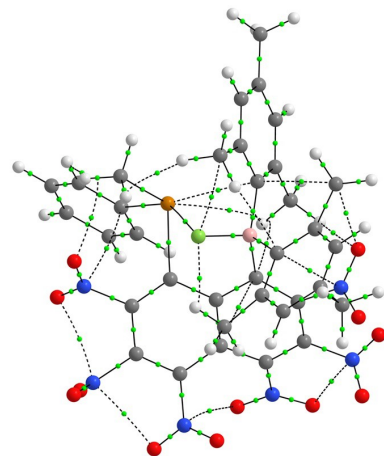

$4\text{NO}_2\cdots\text{F}^-$

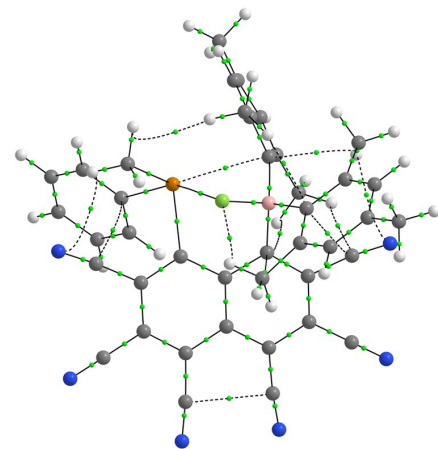

$4\text{CN}\cdots\text{F}^-$

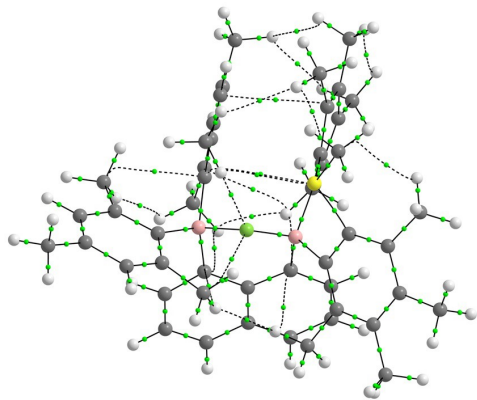

$5\text{CH}_3,\text{H}\cdots\text{F}^-$

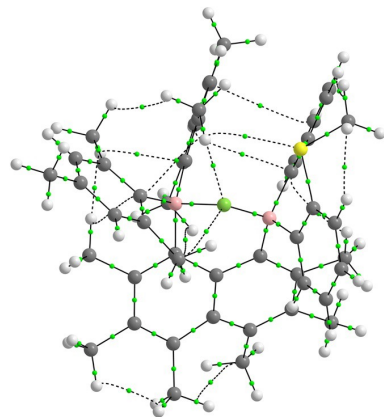

$5\text{H},\text{CH}_3\cdots\text{F}^-$

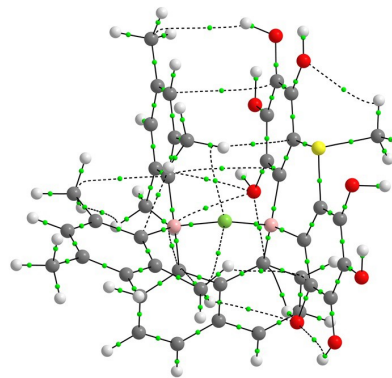

$5\text{OH},\text{H}\cdots\text{F}^-$

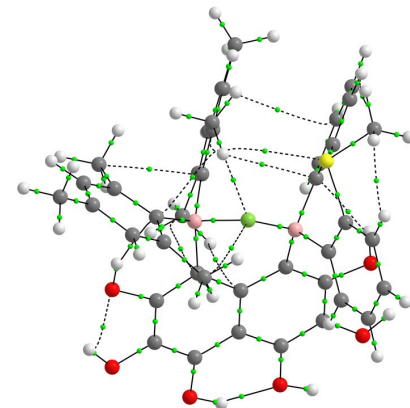

$5\text{H},\text{OH}\cdots\text{F}^-$
