# Supplementary material for: Biofillm: multicellular living of the unicellular bacteria
Source: Royal Society of Chemistry journal article supplement (doi:10.1039/d1cp02514g), 2012-01-01
Supplement: d1cp02514g5.pdf [file d1cp02514g5.pdf]

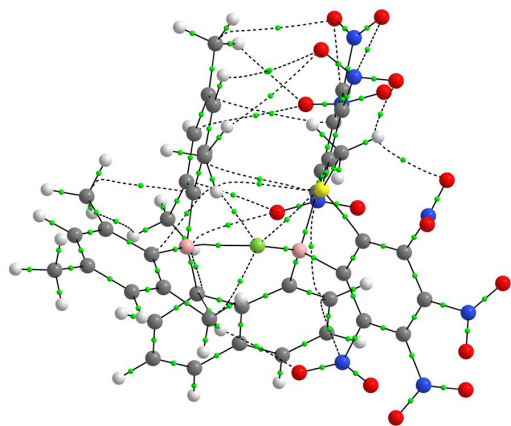

$5\text{NO}_2, \text{H}\cdots\text{F}^-$

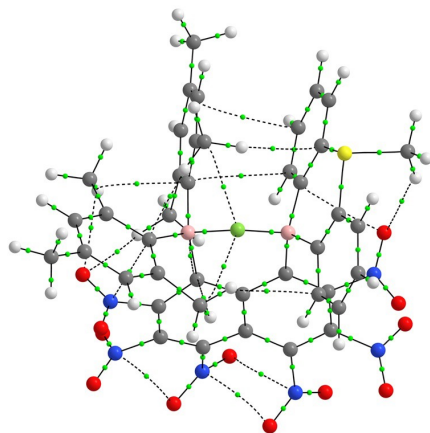

$5\text{H}, \text{NO}_2\cdots\text{F}^-$

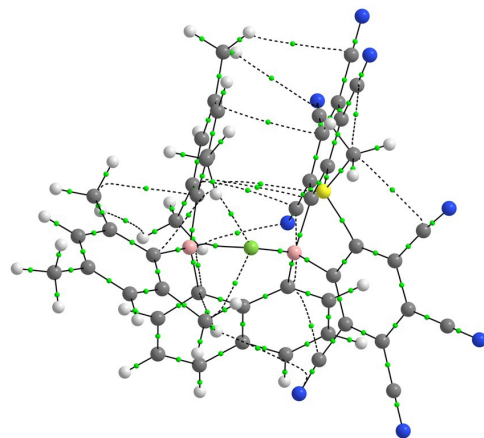

$5\text{CN}, \text{H}\cdots\text{F}^-$

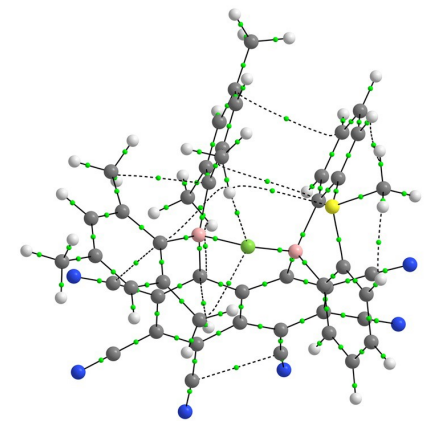

$5\text{H}, \text{CN}\cdots\text{F}^-$

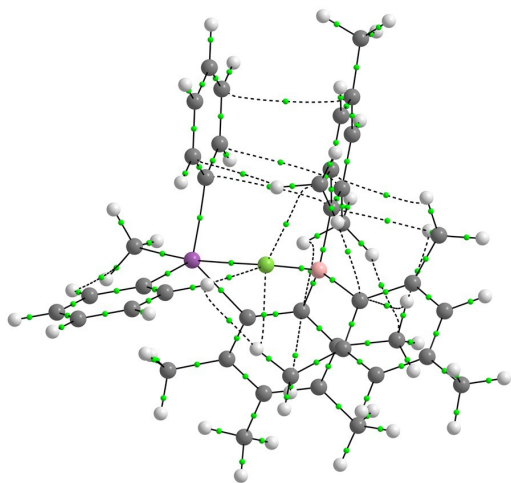

$6\text{CH}_3\cdots\text{F}^-$

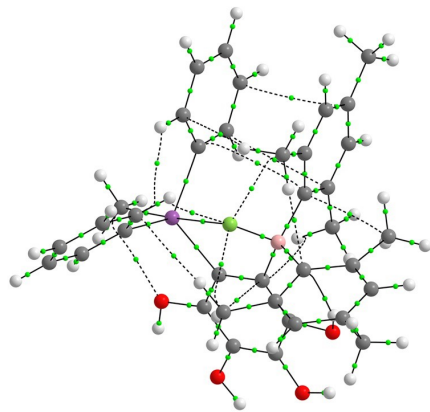

$6\text{OH}\cdots\text{F}^-$

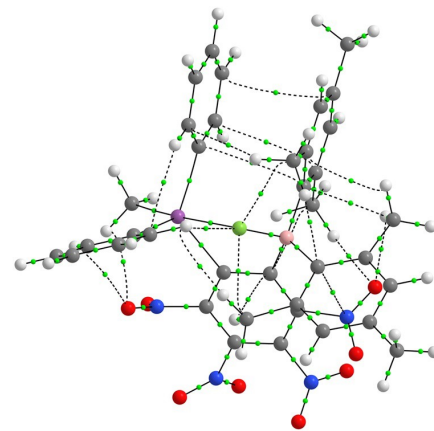

$6\text{NO}_2\cdots\text{F}^-$

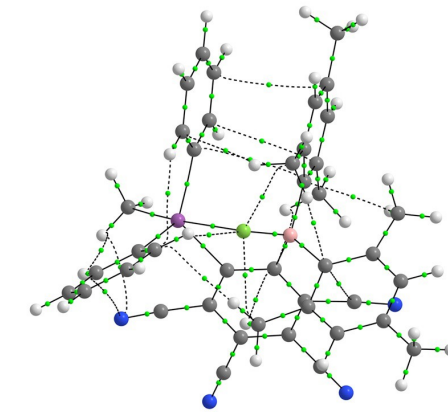

$6\text{CN}\cdots\text{F}^-$
