# Supplementary material for: Biofillm: multicellular living of the unicellular bacteria
Source: Royal Society of Chemistry journal article supplement (doi:10.1039/d1cp02514g), 2012-01-01
Supplement: d1cp02514g6.pdf [file d1cp02514g6.pdf]

## ARTICLE

# Designing Boron and Metal Complexes to Fluoride Recognition: Computational Perspective

Renato Pereira Orenha,<sup>\*a</sup> Leticia Bermudes Peixoto,<sup>a</sup> Giovanni Finoto Caramori,<sup>b</sup> Maurício Jeomar Piotrowski,<sup>c</sup> Krys Elly de Araújo Batista,<sup>c</sup> Julia Contreras–Garcia,<sup>d</sup> Carlos Cardenas,<sup>e,f</sup> Nelson H. Morgon,<sup>g</sup> Fernando Mendizabal,<sup>h</sup> and Renato Luis Tame Parreira<sup>a</sup>

## Supplementary Material

<sup>a</sup> Núcleo de Pesquisas em Ciências Exatas e Tecnológicas, Universidade de Franca, Franca, SP, 14404–600, Brazil. E-mail: rpo9@hotmail.com / renato.parreira@unifran.edu.br

<sup>b</sup> Departamento de Química, Universidade Federal de Santa Catarina, Campus Universitário Trindade, CP 476, Florianópolis, SC, 88040–900, Brazil.

<sup>c</sup> Department of Physics, Federal University of Pelotas, PO Box 354, 96010–900, Pelotas, RS, Brazil.

<sup>d</sup> Sorbonne Université, CNRS, Laboratoire de Chimie Théorique, LCT, F. 75005 Paris, France.

<sup>e</sup> Departamento de Física, Facultad de Ciencias, Universidad de Chile, Casilla 653, 7800024, Santiago, Chile.

<sup>f</sup> Centro para el Desarrollo de la Nanociencia y la Nanotecnología (CEDENNA), Avda. Ecuador 3493, Santiago 9170124, Chile.

<sup>g</sup> Instituto de Química, Universidade Estadual de Campinas, CP 6154, 13083–970, Campinas, SP, Brazil.

**Table S1.** Optimized Cartesian coordinates of the complexes investigated in this study using the BP86–D3(BJ)/def2–TZVP computational model.

| Complex<br>Atom | X         | 1---F <sup>-</sup><br>Y | Z         |
|-----------------|-----------|-------------------------|-----------|
| P               | 3.304240  | 0.118159                | -0.025745 |
| F               | -3.036773 | 0.023046                | 2.356327  |
| B               | -2.890388 | 0.006965                | 0.874207  |
| C               | 1.533326  | 0.105353                | 0.190644  |
| C               | 0.984831  | 0.559516                | 1.406223  |
| C               | -0.394705 | 0.523812                | 1.591673  |
| C               | -1.279672 | 0.057828                | 0.596282  |
| C               | -0.692368 | -0.419617               | -0.593184 |
| C               | 0.682508  | -0.393821               | -0.811446 |
| C               | 3.937988  | 1.676409                | 0.621616  |
| C               | 5.140577  | 1.723097                | 1.342403  |
| C               | 5.624062  | 2.951504                | 1.796914  |
| C               | 4.913899  | 4.126806                | 1.532917  |
| C               | 3.712136  | 4.078881                | 0.817562  |
| C               | 3.217527  | 2.856547                | 0.362702  |
| C               | 3.723442  | -0.036548               | -1.771331 |
| C               | 3.663566  | -1.305945               | -2.373670 |
| C               | 3.929406  | -1.434189               | -3.737002 |
| C               | 4.259526  | -0.305974               | -4.496184 |
| C               | 4.326037  | 0.954150                | -3.893633 |
| C               | 4.057545  | 1.094648                | -2.530722 |
| C               | 4.078509  | -1.261177               | 0.837690  |
| C               | 3.376672  | -1.948523               | 1.839199  |
| C               | 4.000102  | -2.994462               | 2.522462  |
| C               | 5.315015  | -3.352431               | 2.209038  |
| C               | 6.012387  | -2.669489               | 1.206015  |
| C               | 5.398251  | -1.625099               | 0.514954  |
| C               | -3.798814 | 1.302447                | 0.392511  |
| C               | -3.327347 | 2.478216                | -0.249145 |
| C               | -4.206828 | 3.529884                | -0.568534 |
| C               | -5.570254 | 3.482729                | -0.271953 |
| C               | -6.040117 | 2.329480                | 0.365029  |
| C               | -5.192354 | 1.261417                | 0.693802  |
| C               | -1.885849 | 2.681402                | -0.666603 |
| C               | -6.490101 | 4.634545                | -0.594115 |
| C               | -5.846925 | 0.055450                | 1.335544  |
| C               | -3.391479 | -1.439364               | 0.250419  |
| C               | -3.929206 | -1.570965               | -1.058812 |
| C               | -4.323688 | -2.825833               | -1.555555 |
| C               | -4.199341 | -3.998067               | -0.805675 |
| C               | -3.611994 | -3.881667               | 0.458288  |
| C               | -3.199528 | -2.645431               | 0.980829  |
| C               | -4.103868 | -0.398654               | -2.003535 |
| C               | -4.672151 | -5.329102               | -1.336072 |
| C               | -2.509492 | -2.676888               | 2.328712  |
| H               | 1.635905  | 0.949877                | 2.191713  |
| H               | -0.810896 | 0.879138                | 2.536386  |
| H               | -1.335178 | -0.824912               | -1.377799 |
| H               | 1.096124  | -0.751237               | -1.755875 |
| H               | 5.690484  | 0.806787                | 1.558150  |
| H               | 6.555454  | 2.988085                | 2.363240  |
| H               | 5.294376  | 5.084160                | 1.892177  |
| H               | 3.154141  | 4.994515                | 0.618152  |
| H               | 2.272130  | 2.816365                | -0.180357 |
| H               | 3.417580  | -2.187464               | -1.779704 |
| H               | 3.882950  | -2.417881               | -4.205671 |
| H               | 4.471659  | -0.411130               | -5.561195 |
| H               | 4.591865  | 1.831841                | -4.484008 |

|              |           |                    |           |
|--------------|-----------|--------------------|-----------|
| H            | 4.116976  | 2.076508           | -2.060373 |
| H            | 2.347637  | -1.674073          | 2.074159  |
| H            | 3.454073  | -3.533603          | 3.297553  |
| H            | 5.797442  | -4.172179          | 2.743477  |
| H            | 7.035349  | -2.953904          | 0.956647  |
| H            | 5.937793  | -1.103164          | -0.276925 |
| H            | -3.804889 | 4.417334           | -1.069101 |
| H            | -7.105117 | 2.252833           | 0.610489  |
| H            | -1.760886 | 3.671799           | -1.127837 |
| H            | -1.557115 | 1.926226           | -1.396200 |
| H            | -1.190269 | 2.608489           | 0.180239  |
| H            | -6.071528 | 5.271033           | -1.387084 |
| H            | -6.653998 | 5.275094           | 0.288786  |
| H            | -7.479019 | 4.280219           | -0.921787 |
| H            | -6.849496 | 0.314268           | 1.707270  |
| H            | -5.246143 | -0.339491          | 2.163132  |
| H            | -5.957528 | -0.764755          | 0.608260  |
| H            | -4.733971 | -2.885382          | -2.569552 |
| H            | -3.448591 | -4.786677          | 1.053892  |
| H            | -4.239873 | -0.761465          | -3.033269 |
| H            | -3.242973 | 0.282523           | -1.989593 |
| H            | -4.980464 | 0.212675           | -1.740270 |
| H            | -4.044291 | -6.154599          | -0.968992 |
| H            | -4.661642 | -5.349482          | -2.435694 |
| H            | -5.706144 | -5.542374          | -1.016229 |
| H            | -2.252098 | -3.711969          | 2.599013  |
| H            | -3.139574 | -2.256976          | 3.125253  |
| H            | -1.588354 | -2.076925          | 2.320177  |
| Complex Atom | X         | 2-F <sup>-</sup> Y | Z         |
| F            | -0.372592 | -0.112805          | 1.643807  |
| N            | 2.664869  | -0.376252          | 2.409091  |
| B            | -0.690568 | -0.078653          | 0.173056  |
| C            | 0.159426  | -1.321211          | -0.538608 |
| C            | -0.623644 | -2.296819          | -1.156615 |
| C            | -0.125162 | -3.338050          | -1.968301 |
| C            | 1.219311  | -3.385370          | -2.245282 |
| C            | 4.138119  | -0.534859          | 2.631797  |
| C            | 3.463362  | -2.466614          | -2.048009 |
| C            | 4.363136  | -1.545096          | -1.565407 |
| C            | 3.923459  | -0.628934          | -0.591597 |
| C            | 2.611039  | -0.596018          | -0.130259 |
| C            | 1.597299  | -1.439903          | -0.726561 |
| C            | 2.097038  | -2.435372          | -1.658300 |
| C            | -0.205287 | 1.426033           | -0.321107 |
| C            | -0.470800 | 2.528308           | 0.545474  |
| C            | 0.061211  | 3.799921           | 0.288333  |
| C            | 0.862284  | 4.058953           | -0.829149 |
| C            | 1.047564  | 3.007211           | -1.727719 |
| C            | 0.517118  | 1.723629           | -1.507894 |
| C            | -1.369841 | 2.414468           | 1.760803  |
| C            | 1.479907  | 5.415598           | -1.059262 |
| C            | 0.712255  | 0.753376           | -2.658203 |
| C            | -2.326584 | -0.327174          | 0.102577  |
| C            | -2.937322 | -1.234317          | 1.019707  |
| C            | -4.331179 | -1.400121          | 1.059773  |
| C            | -5.190175 | -0.704894          | 0.204369  |
| C            | -4.595237 | 0.138671           | -0.736590 |
| C            | -3.203602 | 0.327026           | -0.806052 |
| C            | -2.142654 | -2.105959          | 1.972550  |
| C            | -6.688120 | -0.860266          | 0.291798  |
| C            | -2.718848 | 1.236174           | -1.915162 |

|         |           |                               |           |
|---------|-----------|-------------------------------|-----------|
| C       | 2.373830  | 0.306378                      | 1.040980  |
| C       | 2.010436  | -1.726640                     | 2.495816  |
| C       | 2.095573  | 0.521221                      | 3.470602  |
| H       | -1.706272 | -2.224579                     | -1.038817 |
| H       | -0.812141 | -4.066461                     | -2.405706 |
| H       | 1.637322  | -4.132000                     | -2.924765 |
| H       | 4.291908  | -0.990098                     | 3.616265  |
| H       | 4.611466  | 0.452133                      | 2.592829  |
| H       | 4.546137  | -1.183897                     | 1.851107  |
| H       | 3.775369  | -3.227979                     | -2.767249 |
| H       | 5.401496  | -1.538212                     | -1.899669 |
| H       | 4.642887  | 0.074703                      | -0.167449 |
| H       | -0.171115 | 4.618593                      | 0.978365  |
| H       | 1.605945  | 3.192081                      | -2.652149 |
| H       | -1.816646 | 3.394274                      | 1.988387  |
| H       | -0.816878 | 2.083785                      | 2.652672  |
| H       | -2.173949 | 1.684884                      | 1.601261  |
| H       | 1.686741  | 5.586778                      | -2.125673 |
| H       | 2.437619  | 5.513387                      | -0.520686 |
| H       | 0.824350  | 6.222691                      | -0.699634 |
| H       | 0.534135  | 1.276392                      | -3.610852 |
| H       | 0.040750  | -0.108788                     | -2.609045 |
| H       | 1.740682  | 0.360944                      | -2.692569 |
| H       | -4.756148 | -2.111875                     | 1.776070  |
| H       | -5.233019 | 0.664747                      | -1.455058 |
| H       | -2.753692 | -2.961903                     | 2.296756  |
| H       | -1.828546 | -1.551364                     | 2.868268  |
| H       | -1.226572 | -2.487991                     | 1.503625  |
| H       | -7.168339 | -0.677775                     | -0.680715 |
| H       | -7.122167 | -0.143065                     | 1.008776  |
| H       | -6.968427 | -1.867871                     | 0.632819  |
| H       | -3.542156 | 1.452654                      | -2.611873 |
| H       | -1.899960 | 0.782172                      | -2.487372 |
| H       | -2.336078 | 2.191572                      | -1.529184 |
| H       | 1.346335  | 0.650605                      | 1.120735  |
| H       | 3.048822  | 1.170787                      | 1.017495  |
| H       | 2.180265  | -2.118603                     | 3.504758  |
| H       | 2.470015  | -2.384341                     | 1.752057  |
| H       | 0.943933  | -1.597744                     | 2.289474  |
| H       | 2.324241  | 0.094366                      | 4.453267  |
| H       | 1.014862  | 0.582352                      | 3.311060  |
| H       | 2.555423  | 1.510817                      | 3.372227  |
| Complex |           | 3 <sup>+</sup> F <sup>-</sup> |           |
| Atom    | X         | Y                             | Z         |
| Fe      | -2.482635 | -0.834023                     | -0.630888 |
| C       | -1.621050 | -1.388325                     | -2.392652 |
| C       | -4.493828 | -0.842544                     | -1.000777 |
| C       | -1.551580 | -2.440801                     | -1.428967 |
| C       | -0.944466 | -0.252228                     | -1.837309 |
| C       | -4.018116 | 0.506042                      | -0.867079 |
| C       | -4.209088 | -1.536269                     | 0.223513  |
| C       | -0.814433 | -1.940318                     | -0.287275 |
| C       | -0.386927 | -0.571013                     | -0.549451 |
| C       | -3.441199 | 0.646588                      | 0.436942  |
| C       | -3.554571 | -0.615293                     | 1.109352  |
| B       | 0.612903  | 0.364310                      | 0.341724  |
| C       | 2.227515  | 0.291310                      | -0.073484 |
| C       | 3.132512  | 1.007892                      | 0.768573  |
| C       | 2.820308  | -0.440272                     | -1.139891 |
| C       | 4.518808  | 0.963739                      | 0.560655  |
| C       | 4.217799  | -0.466189                     | -1.314969 |
| C       | 5.093745  | 0.222576                      | -0.476585 |

| Journal Name |           |                               |           | ARTICLE |
|--------------|-----------|-------------------------------|-----------|---------|
| C            | 0.043339  | 1.914032                      | 0.336874  |         |
| C            | 0.295285  | 2.787168                      | -0.756875 |         |
| C            | -0.761774 | 2.440326                      | 1.387211  |         |
| C            | -0.271302 | 4.073024                      | -0.810534 |         |
| C            | -1.299758 | 3.735614                      | 1.308179  |         |
| C            | -1.083572 | 4.572357                      | 0.209258  |         |
| C            | 2.038472  | -1.200971                     | -2.192030 |         |
| C            | 2.659888  | 1.881086                      | 1.912103  |         |
| C            | 6.589217  | 0.156599                      | -0.664089 |         |
| C            | -1.080689 | 1.674508                      | 2.655160  |         |
| C            | -1.719013 | 5.937928                      | 0.120126  |         |
| C            | -0.698295 | -2.699336                     | 0.988604  |         |
| N            | 0.505716  | -3.674904                     | 1.087306  |         |
| C            | 1.799688  | -2.918300                     | 1.063773  |         |
| C            | 0.477325  | -4.656273                     | -0.043663 |         |
| C            | 0.388188  | -4.409151                     | 2.389540  |         |
| F            | 0.589287  | -0.206057                     | 1.719138  |         |
| C            | 1.225347  | 2.433658                      | -1.899552 |         |
| H            | -2.141503 | -1.427906                     | -3.346909 |         |
| H            | -4.958305 | -1.272093                     | -1.885093 |         |
| H            | -2.010392 | -3.424027                     | -1.513890 |         |
| H            | -0.875115 | 0.719639                      | -2.318247 |         |
| H            | -4.060431 | 1.277272                      | -1.632251 |         |
| H            | -4.425611 | -2.581305                     | 0.431494  |         |
| H            | -2.958360 | 1.540205                      | 0.819080  |         |
| H            | -3.190847 | -0.842356                     | 2.108397  |         |
| H            | 5.170447  | 1.530019                      | 1.235172  |         |
| H            | 4.630504  | -1.049415                     | -2.145060 |         |
| H            | -0.060397 | 4.705370                      | -1.679953 |         |
| H            | -1.918961 | 4.097435                      | 2.136478  |         |
| H            | 1.274381  | -1.869375                     | -1.777712 |         |
| H            | 1.493661  | -0.520302                     | -2.865249 |         |
| H            | 2.722484  | -1.799601                     | -2.810403 |         |
| H            | 2.137331  | 2.774127                      | 1.536622  |         |
| H            | 1.945392  | 1.353610                      | 2.555558  |         |
| H            | 3.514105  | 2.213513                      | 2.520034  |         |
| H            | 7.058621  | -0.501012                     | 0.086515  |         |
| H            | 6.849773  | -0.237029                     | -1.657017 |         |
| H            | 7.053169  | 1.148808                      | -0.554744 |         |
| H            | -1.858753 | 2.200862                      | 3.228432  |         |
| H            | -1.418592 | 0.653680                      | 2.446441  |         |
| H            | -0.192848 | 1.576054                      | 3.297823  |         |
| H            | -1.148070 | 6.603017                      | -0.544115 |         |
| H            | -2.744618 | 5.876823                      | -0.281591 |         |
| H            | -1.788549 | 6.414840                      | 1.109221  |         |
| H            | -1.575453 | -3.342736                     | 1.137628  |         |
| H            | -0.578132 | -2.017631                     | 1.835140  |         |
| H            | 2.620842  | -3.632597                     | 1.188613  |         |
| H            | 1.887292  | -2.397320                     | 0.108383  |         |
| H            | 1.784314  | -2.175964                     | 1.866244  |         |
| H            | 0.563367  | -4.106991                     | -0.985948 |         |
| H            | 1.319278  | -5.347166                     | 0.072786  |         |
| H            | -0.470498 | -5.204419                     | -0.011810 |         |
| H            | 1.233550  | -5.099610                     | 2.482788  |         |
| H            | 0.406011  | -3.677541                     | 3.204252  |         |
| H            | -0.555968 | -4.964276                     | 2.400024  |         |
| H            | 1.044758  | 3.096816                      | -2.758851 |         |
| H            | 2.278745  | 2.549596                      | -1.599104 |         |
| H            | 1.117137  | 1.397900                      | -2.236196 |         |
| Complex      |           | 4 <sup>+</sup> F <sup>-</sup> |           |         |
| Atom         | X         | Y                             | Z         |         |
| Te           | -1.537311 | -0.197204                     | -0.979709 |         |

| ARTICLE |           |           | Journal Name |
|---------|-----------|-----------|--------------|
| F       | 0.928083  | 0.096573  | -1.404658    |
| C       | 1.231147  | 1.443145  | 0.677361     |
| C       | 2.259543  | 2.031740  | 1.408954     |
| C       | 2.172447  | 3.298228  | 2.021879     |
| C       | 1.022220  | 4.037267  | 1.876551     |
| C       | -1.243059 | 4.314136  | 1.022782     |
| C       | -2.356379 | 3.853715  | 0.360876     |
| C       | -2.336992 | 2.551580  | -0.179031    |
| C       | -1.211936 | 1.749016  | -0.089535    |
| C       | -0.000192 | 2.186488  | 0.552788     |
| C       | -0.076599 | 3.514488  | 1.144794     |
| C       | 3.165052  | -0.190033 | -0.210074    |
| C       | 3.975464  | -0.971131 | 0.656964     |
| C       | 5.353711  | -1.112291 | 0.424730     |
| C       | 5.995261  | -0.489111 | -0.649145    |
| C       | 5.212874  | 0.332241  | -1.466521    |
| C       | 3.834372  | 0.499838  | -1.259760    |
| C       | 3.128270  | 1.476042  | -2.177957    |
| C       | 7.467290  | -0.688555 | -0.911264    |
| C       | 3.425798  | -1.665040 | 1.884746     |
| C       | 0.751391  | -1.296831 | 0.650281     |
| C       | 0.683828  | -2.491616 | -0.125145    |
| C       | -0.231360 | -3.505416 | 0.188407     |
| C       | -1.107991 | -3.404415 | 1.274098     |
| C       | -0.961519 | -2.290675 | 2.105071     |
| C       | -0.045522 | -1.260023 | 1.829312     |
| C       | 0.018398  | -0.152659 | 2.860054     |
| C       | -2.163058 | -4.446679 | 1.538693     |
| C       | 1.528951  | -2.703154 | -1.361115    |
| C       | -3.645222 | -0.220942 | -0.553998    |
| C       | -4.637895 | 0.064125  | -1.497605    |
| C       | -5.985414 | -0.049550 | -1.135814    |
| C       | -6.335524 | -0.444932 | 0.158667     |
| C       | -5.338446 | -0.737963 | 1.096256     |
| C       | -3.991782 | -0.634199 | 0.739737     |
| C       | -1.724990 | 0.586647  | -2.968411    |
| B       | 1.550966  | -0.008888 | 0.000836     |
| H       | 3.196401  | 1.479141  | 1.503759     |
| H       | 3.019616  | 3.692040  | 2.587778     |
| H       | 0.926707  | 5.034205  | 2.312903     |
| H       | -1.236561 | 5.306952  | 1.478824     |
| H       | -3.253524 | 4.466523  | 0.263386     |
| H       | -3.243207 | 2.183844  | -0.661027    |
| H       | 5.945081  | -1.720995 | 1.116852     |
| H       | 5.693303  | 0.880759  | -2.283920    |
| H       | 2.419585  | 2.107213  | -1.624579    |
| H       | 2.545570  | 0.961471  | -2.955501    |
| H       | 3.863692  | 2.125167  | -2.675896    |
| H       | 7.916755  | 0.201137  | -1.376317    |
| H       | 7.637992  | -1.534840 | -1.597789    |
| H       | 8.014318  | -0.908304 | 0.017165     |
| H       | 4.249351  | -1.983561 | 2.540550     |
| H       | 2.833500  | -2.554655 | 1.625013     |
| H       | 2.761968  | -1.009064 | 2.464155     |
| H       | -0.272983 | -4.395409 | -0.447822    |
| H       | -1.576809 | -2.217977 | 3.007744     |
| H       | 1.036656  | 0.227082  | 3.002236     |
| H       | -0.353035 | -0.525421 | 3.825457     |
| H       | -0.601905 | 0.712468  | 2.581184     |
| H       | -2.331594 | -4.585604 | 2.616474     |
| H       | -1.889684 | -5.416536 | 1.099468     |
| H       | -3.127046 | -4.144701 | 1.096170     |

|         |           |                               |           |
|---------|-----------|-------------------------------|-----------|
| H       | 1.604980  | -3.775298                     | -1.592908 |
| H       | 2.537714  | -2.288590                     | -1.240547 |
| H       | 1.085951  | -2.198860                     | -2.234067 |
| H       | -4.381147 | 0.378030                      | -2.510050 |
| H       | -6.761244 | 0.173866                      | -1.870193 |
| H       | -7.387319 | -0.529416                     | 0.436748  |
| H       | -5.608784 | -1.052290                     | 2.105810  |
| H       | -3.214372 | -0.878218                     | 1.468467  |
| H       | -2.349845 | 1.485220                      | -2.939446 |
| H       | -2.157788 | -0.191356                     | -3.606313 |
| H       | -0.702499 | 0.824985                      | -3.276949 |
| Complex |           | 5 <sup>+</sup> F <sup>-</sup> |           |
| Atom    | X         | Y                             | Z         |
| C       | 2.000115  | -1.325205                     | 4.383994  |
| C       | 3.063533  | -1.106875                     | 3.533408  |
| C       | 0.664550  | -1.200921                     | 3.911178  |
| C       | 2.826547  | -0.700147                     | 2.199468  |
| C       | 1.546052  | -0.520135                     | 1.688624  |
| C       | 0.426618  | -0.844234                     | 2.532122  |
| B       | 1.386285  | 0.174819                      | 0.253896  |
| C       | -0.921846 | -0.789790                     | 2.048895  |
| C       | -0.435815 | -1.398742                     | 4.786921  |
| C       | -1.728875 | -1.254101                     | 4.326128  |
| C       | -1.958520 | -0.968971                     | 2.961191  |
| B       | -1.302629 | -0.701886                     | 0.502817  |
| C       | 2.561821  | -0.258619                     | -0.766224 |
| C       | 0.838229  | 1.702827                      | 0.175328  |
| C       | -1.960568 | -2.070058                     | -0.075941 |
| C       | -2.205728 | 0.559358                      | 0.054520  |
| C       | 3.624817  | 0.633075                      | -1.072193 |
| C       | 2.633937  | -1.565640                     | -1.322006 |
| C       | 4.643459  | 0.255303                      | -1.960853 |
| C       | 3.745193  | 2.005734                      | -0.443934 |
| C       | 3.660509  | -1.903331                     | -2.218197 |
| C       | 1.654586  | -2.665822                     | -0.969202 |
| C       | 4.667335  | -1.000929                     | -2.574113 |
| C       | 5.739644  | -1.370764                     | -3.568205 |
| C       | 0.387500  | 2.193359                      | -1.086585 |
| C       | 0.718244  | 2.584724                      | 1.281336  |
| C       | -0.231864 | 3.443062                      | -1.193994 |
| C       | 0.593265  | 1.447560                      | -2.388356 |
| C       | 0.108890  | 3.842250                      | 1.128767  |
| C       | 1.238019  | 2.279199                      | 2.669413  |
| C       | -0.402314 | 4.284313                      | -0.091079 |
| C       | -1.124121 | 5.599715                      | -0.219066 |
| C       | -2.445047 | -2.132815                     | -1.392228 |
| C       | -2.961896 | -3.288808                     | -1.984449 |
| C       | -3.031739 | -4.451447                     | -1.213856 |
| S       | -2.235043 | -0.648000                     | -2.394808 |
| C       | -2.576757 | -4.437219                     | 0.107840  |
| C       | -2.053185 | -3.264871                     | 0.658560  |
| C       | -2.718274 | 0.655668                      | -1.248375 |
| C       | -2.539060 | 1.617561                      | 0.915307  |
| C       | -3.472224 | 1.734229                      | -1.717940 |
| C       | -3.306288 | 2.702629                      | 0.490911  |
| C       | -3.772556 | 2.764725                      | -0.825140 |
| C       | -3.598243 | -0.719839                     | -3.574791 |
| H       | 2.163824  | -1.598280                     | 5.429905  |
| H       | 4.088912  | -1.220208                     | 3.893594  |
| H       | 3.683544  | -0.481038                     | 1.556993  |
| H       | -0.238239 | -1.659284                     | 5.830130  |
| H       | -2.574896 | -1.389222                     | 5.003862  |

|   |           |           |           |
|---|-----------|-----------|-----------|
| H | -2.992587 | -0.926652 | 2.605668  |
| H | 5.450301  | 0.965351  | -2.170111 |
| H | 3.041274  | 2.725017  | -0.888483 |
| H | 3.529840  | 1.986608  | 0.633317  |
| H | 4.763740  | 2.396456  | -0.583269 |
| H | 3.684298  | -2.916633 | -2.632905 |
| H | 0.715869  | -2.584137 | -1.537182 |
| H | 2.095846  | -3.648183 | -1.191838 |
| H | 1.379668  | -2.636887 | 0.093601  |
| H | 6.679058  | -0.837062 | -3.363034 |
| H | 5.944125  | -2.451297 | -3.555058 |
| H | 5.435014  | -1.109902 | -4.595685 |
| H | -0.596687 | 3.767585  | -2.173727 |
| H | 0.503360  | 0.362829  | -2.289730 |
| H | -0.128036 | 1.793674  | -3.143470 |
| H | 1.604190  | 1.641801  | -2.783578 |
| H | 0.021250  | 4.491807  | 2.005756  |
| H | 1.271992  | 3.202288  | 3.265788  |
| H | 0.596902  | 1.560543  | 3.200311  |
| H | 2.243986  | 1.840893  | 2.653203  |
| H | -2.206273 | 5.437159  | -0.356322 |
| H | -0.990502 | 6.220572  | 0.678029  |
| H | -0.773458 | 6.171557  | -1.091834 |
| H | -3.312696 | -3.305281 | -3.015157 |
| H | -3.443122 | -5.361546 | -1.652377 |
| H | -2.624696 | -5.347343 | 0.708664  |
| H | -1.696606 | -3.265450 | 1.690077  |
| H | -2.159541 | 1.587869  | 1.937420  |
| H | -3.830067 | 1.789702  | -2.744700 |
| H | -3.528338 | 3.515686  | 1.184235  |
| H | -4.367268 | 3.613124  | -1.166325 |
| H | -4.553287 | -0.833938 | -3.051991 |
| H | -3.558556 | 0.205157  | -4.159531 |
| H | -3.393592 | -1.560719 | -4.245569 |
| F | 0.002916  | -0.615034 | -0.347602 |

| Complex Atom | X         | 6-F <sup>-</sup> Y | Z         |
|--------------|-----------|--------------------|-----------|
| Sb           | 1.700975  | 0.013223           | -0.281481 |
| F            | -0.641014 | -0.457776          | -0.851740 |
| C            | 0.681785  | -0.135887          | 1.573910  |
| C            | -0.719951 | -0.078673          | 1.583699  |
| C            | -1.332293 | -0.281215          | 2.833671  |
| C            | -0.587963 | -0.494211          | 3.996978  |
| C            | 0.811043  | -0.523029          | 3.947577  |
| C            | 1.457715  | -0.347628          | 2.720478  |
| C            | 1.393446  | 1.592496           | -1.676208 |
| C            | 1.894127  | -1.871862          | -1.224821 |
| C            | 1.929441  | -3.016801          | -0.419704 |
| C            | 2.033742  | -4.276318          | -1.016893 |
| C            | 2.100159  | -4.387499          | -2.409800 |
| C            | 2.066223  | -3.240036          | -3.208961 |
| C            | 1.963876  | -1.975948          | -2.618407 |
| C            | 3.712407  | 0.384205           | 0.366168  |
| C            | 4.727761  | -0.547752          | 0.115864  |
| C            | 6.035104  | -0.289162          | 0.543339  |
| C            | 6.328550  | 0.898780           | 1.220173  |
| C            | 5.315607  | 1.831360           | 1.471049  |
| C            | 4.008581  | 1.575634           | 1.045640  |
| C            | -1.627264 | 1.726316           | -0.321058 |
| C            | -1.230739 | 2.881211           | 0.403384  |
| C            | -1.190503 | 4.140750           | -0.221614 |
| C            | -1.549879 | 4.327001           | -1.558076 |



|         |           |           |           |
|---------|-----------|-----------|-----------|
| C       | -1.987070 | 3.199948  | -2.260602 |
| C       | -2.026108 | 1.927409  | -1.674482 |
| C       | -0.860044 | 2.868974  | 1.871893  |
| C       | -1.461927 | 5.680193  | -2.218005 |
| C       | -2.503687 | 0.793110  | -2.555754 |
| C       | -2.948042 | -0.675727 | 0.279872  |
| C       | -4.196441 | -0.075761 | 0.593193  |
| C       | -5.367843 | -0.848381 | 0.667495  |
| C       | -5.364365 | -2.228815 | 0.450206  |
| C       | -4.127270 | -2.830326 | 0.197110  |
| C       | -2.936554 | -2.090755 | 0.123920  |
| C       | -4.342223 | 1.403007  | 0.882935  |
| C       | -6.638155 | -3.036076 | 0.488531  |
| C       | -1.659552 | -2.876583 | -0.085283 |
| B       | -1.556072 | 0.174630  | 0.211365  |
| H       | -2.424289 | -0.271256 | 2.887350  |
| H       | -1.098911 | -0.644046 | 4.950849  |
| H       | 1.396412  | -0.692851 | 4.852950  |
| H       | 2.547883  | -0.378016 | 2.666158  |
| H       | 2.346986  | 1.754537  | -2.191016 |
| H       | 0.595294  | 1.292785  | -2.359344 |
| H       | 1.086456  | 2.479935  | -1.111516 |
| H       | 1.865570  | -2.935350 | 0.667554  |
| H       | 2.057951  | -5.171070 | -0.392652 |
| H       | 2.177419  | -5.371980 | -2.874214 |
| H       | 2.117402  | -3.326550 | -4.295649 |
| H       | 1.934455  | -1.085923 | -3.249580 |
| H       | 4.504459  | -1.478062 | -0.410944 |
| H       | 6.824028  | -1.017814 | 0.347750  |
| H       | 7.348147  | 1.098822  | 1.554247  |
| H       | 5.542856  | 2.758619  | 2.000210  |
| H       | 3.224829  | 2.307971  | 1.253901  |
| H       | -0.875772 | 5.008456  | 0.367309  |
| H       | -2.309046 | 3.311915  | -3.301399 |
| H       | -0.788032 | 3.899194  | 2.248632  |
| H       | -1.601000 | 2.334706  | 2.481800  |
| H       | 0.104632  | 2.375423  | 2.058625  |
| H       | -2.278497 | 5.829159  | -2.939975 |
| H       | -1.502100 | 6.491296  | -1.476858 |
| H       | -0.515533 | 5.789802  | -2.773605 |
| H       | -3.078005 | 1.184840  | -3.407752 |
| H       | -1.656865 | 0.214013  | -2.954661 |
| H       | -3.130071 | 0.082719  | -1.999931 |
| H       | -6.312020 | -0.351305 | 0.913884  |
| H       | -4.080490 | -3.917330 | 0.070933  |
| H       | -5.330835 | 1.608672  | 1.318735  |
| H       | -3.577375 | 1.762475  | 1.584902  |
| H       | -4.235696 | 2.011582  | -0.026967 |
| H       | -7.394443 | -2.562110 | 1.130975  |
| H       | -7.078973 | -3.132031 | -0.517998 |
| H       | -6.456982 | -4.055339 | 0.860411  |
| H       | -0.873348 | -2.558081 | 0.613367  |
| H       | -1.843884 | -3.950195 | 0.065688  |
| H       | -1.243036 | -2.736838 | -1.092273 |
| Complex |           | 7-F-      |           |
| Atom    | X         | Y         | Z         |
| Sb      | 0.219126  | 0.021719  | 1.890872  |
| Pd      | -0.007602 | 0.001944  | -0.739627 |
| Cl      | -0.071919 | -0.178412 | -3.217915 |
| P       | 2.302748  | -0.198654 | -0.530765 |
| P       | -1.057551 | 2.078698  | -0.385162 |
| P       | -1.398869 | -1.825012 | -0.318668 |

| ARTICLE |           |           | Journal Name |
|---------|-----------|-----------|--------------|
| F       | 0.446585  | 0.092038  | 3.942836     |
| C       | 1.917607  | -1.313596 | 1.954128     |
| C       | 2.683068  | -1.413278 | 0.784593     |
| C       | 3.713436  | -2.359655 | 0.717960     |
| C       | 3.955539  | -3.201005 | 1.809027     |
| C       | 3.206215  | -3.071441 | 2.981486     |
| C       | 2.188096  | -2.113009 | 3.063646     |
| C       | 3.293024  | -0.733608 | -1.955802    |
| C       | 4.390161  | -0.001724 | -2.431414    |
| C       | 5.102016  | -0.456310 | -3.546395    |
| C       | 4.728215  | -1.643714 | -4.183330    |
| C       | 3.631443  | -2.375409 | -3.709825    |
| C       | 2.907344  | -1.915701 | -2.610342    |
| C       | 3.151356  | 1.295652  | 0.107262     |
| C       | 2.750976  | 2.543967  | -0.394748    |
| C       | 3.311191  | 3.719808  | 0.102140     |
| C       | 4.266091  | 3.661722  | 1.122887     |
| C       | 4.668599  | 2.422833  | 1.630252     |
| C       | 4.118958  | 1.242521  | 1.122321     |
| C       | 0.372686  | 2.179950  | 2.017288     |
| C       | -0.214530 | 2.946034  | 0.998053     |
| C       | -0.094157 | 4.342997  | 1.048579     |
| C       | 0.633425  | 4.951884  | 2.073490     |
| C       | 1.227270  | 4.175961  | 3.072029     |
| C       | 1.079807  | 2.784716  | 3.057765     |
| C       | -1.141755 | 3.328025  | -1.711475    |
| C       | -0.185962 | 3.266121  | -2.737175    |
| C       | -0.165247 | 4.240970  | -3.738109    |
| C       | -1.108158 | 5.273819  | -3.729690    |
| C       | -2.077216 | 5.328311  | -2.720482    |
| C       | -2.096082 | 4.359981  | -1.714529    |
| C       | -2.786754 | 1.932701  | 0.187327     |
| C       | -3.783370 | 1.638230  | -0.760677    |
| C       | -5.078379 | 1.322182  | -0.351961    |
| C       | -5.397205 | 1.291495  | 1.011159     |
| C       | -4.417323 | 1.601503  | 1.957372     |
| C       | -3.120397 | 1.925179  | 1.550149     |
| C       | -1.679126 | -0.920418 | 2.303316     |
| C       | -2.306459 | -1.620344 | 1.261426     |
| C       | -3.587065 | -2.151464 | 1.477212     |
| C       | -4.219930 | -1.983161 | 2.711139     |
| C       | -3.568345 | -1.316655 | 3.752517     |
| C       | -2.288285 | -0.790135 | 3.553244     |
| C       | -2.681861 | -2.308510 | -1.517942    |
| C       | -3.208166 | -1.318228 | -2.358500    |
| C       | -4.248873 | -1.622832 | -3.238658    |
| C       | -4.757882 | -2.924481 | -3.295543    |
| C       | -4.221199 | -3.922853 | -2.473487    |
| C       | -3.185850 | -3.618380 | -1.586741    |
| C       | -0.435296 | -3.356653 | -0.081941    |
| C       | 0.159939  | -3.928486 | -1.222353    |
| C       | 1.037996  | -5.003677 | -1.095178    |
| C       | 1.346027  | -5.513061 | 0.173177     |
| C       | 0.756574  | -4.949936 | 1.307204     |
| C       | -0.135613 | -3.880448 | 1.183263     |
| H       | 4.323938  | -2.436512 | -0.183093    |
| H       | 4.741861  | -3.954947 | 1.744212     |
| H       | 3.400471  | -3.728045 | 3.831322     |
| H       | 1.594968  | -2.004213 | 3.970957     |
| H       | 4.690094  | 0.918812  | -1.928573    |
| H       | 5.955193  | 0.117221  | -3.913253    |
| H       | 5.288033  | -1.998067 | -5.050646    |

|         |           |                        |           |
|---------|-----------|------------------------|-----------|
| H       | 3.333264  | -3.300480              | -4.206477 |
| H       | 2.041502  | -2.471585              | -2.248430 |
| H       | 1.974194  | 2.588825               | -1.159395 |
| H       | 2.981304  | 4.683450               | -0.288230 |
| H       | 4.685836  | 4.582517               | 1.531318  |
| H       | 5.408991  | 2.373044               | 2.430743  |
| H       | 4.431458  | 0.280027               | 1.529040  |
| H       | -0.550010 | 4.955177               | 0.269479  |
| H       | 0.744569  | 6.037503               | 2.084529  |
| H       | 1.812724  | 4.649633               | 3.861877  |
| H       | 1.518819  | 2.170273               | 3.842295  |
| H       | 0.511262  | 2.426904               | -2.764211 |
| H       | 0.580861  | 4.186056               | -4.532839 |
| H       | -1.095394 | 6.032291               | -4.514479 |
| H       | -2.818434 | 6.129515               | -2.715240 |
| H       | -2.852002 | 4.404313               | -0.928705 |
| H       | -3.542387 | 1.660164               | -1.824729 |
| H       | -5.838961 | 1.090747               | -1.099743 |
| H       | -6.406341 | 1.028734               | 1.332440  |
| H       | -4.657681 | 1.584434               | 3.021308  |
| H       | -2.365637 | 2.167414               | 2.299435  |
| H       | -4.092236 | -2.692110              | 0.675876  |
| H       | -5.225384 | -2.380598              | 2.859540  |
| H       | -4.062237 | -1.189119              | 4.717372  |
| H       | -1.769837 | -0.261391              | 4.351917  |
| H       | -2.774546 | -0.320181              | -2.329034 |
| H       | -4.655241 | -0.845515              | -3.888209 |
| H       | -5.567511 | -3.165111              | -3.986933 |
| H       | -4.612093 | -4.940810              | -2.521095 |
| H       | -2.768327 | -4.397175              | -0.946347 |
| H       | -0.065180 | -3.518934              | -2.210001 |
| H       | 1.493436  | -5.438616              | -1.986750 |
| H       | 2.046148  | -6.343819              | 0.274375  |
| H       | 0.994637  | -5.338809              | 2.298385  |
| H       | -0.590860 | -3.449219              | 2.075650  |
| Complex |           | <b>8-F<sup>-</sup></b> |           |
| Atom    | X         | Y                      | Z         |
| Sb      | -0.000029 | -1.210542              | 1.310819  |
| Pd      | -0.000151 | 0.938256               | -0.186098 |
| Cl      | -0.000259 | 2.778776               | -1.793733 |
| P       | -2.269996 | 0.722910               | -0.041472 |
| P       | 2.269735  | 0.723395               | -0.041278 |
| F       | -0.000047 | -2.861121              | 2.583153  |
| C       | -1.930143 | -0.838927              | 2.246532  |
| C       | -2.805185 | 0.012319               | 1.555791  |
| C       | -4.078819 | 0.277358               | 2.083734  |
| C       | -4.458268 | -0.286108              | 3.304108  |
| C       | -3.579911 | -1.131461              | 3.989625  |
| C       | -2.319981 | -1.423876              | 3.454098  |
| C       | -3.272699 | 2.226392               | -0.229088 |
| C       | -2.831228 | 3.390222               | 0.421434  |
| C       | -3.587795 | 4.559889               | 0.347874  |
| C       | -4.780578 | 4.577903               | -0.385881 |
| C       | -5.216867 | 3.422908               | -1.042054 |
| C       | -4.466754 | 2.245458               | -0.963419 |
| C       | -2.855909 | -0.442907              | -1.309153 |
| C       | -2.604406 | -0.122308              | -2.655501 |
| C       | -2.911620 | -1.040271              | -3.658209 |
| C       | -3.451877 | -2.289202              | -3.326042 |
| C       | -3.695480 | -2.611532              | -1.988983 |
| C       | -3.401454 | -1.690603              | -0.979064 |
| C       | 1.930036  | -0.838753              | 2.246536  |

| ARTICLE      |           |                       |           | Journal Name |
|--------------|-----------|-----------------------|-----------|--------------|
| C            | 2.804923  | 0.012795              | 1.555980  |              |
| C            | 4.078476  | 0.278031              | 2.084013  |              |
| C            | 4.458023  | -0.285580             | 3.304291  |              |
| C            | 3.579842  | -1.131278             | 3.989607  |              |
| C            | 2.319977  | -1.423842             | 3.454005  |              |
| C            | 3.271988  | 2.227225              | -0.228574 |              |
| C            | 2.830182  | 3.390745              | 0.422286  |              |
| C            | 3.586278  | 4.560720              | 0.348861  |              |
| C            | 4.778928  | 4.579365              | -0.385102 |              |
| C            | 5.215556  | 3.424682              | -1.041590 |              |
| C            | 4.465914  | 2.246919              | -0.963088 |              |
| C            | 2.856264  | -0.442118             | -1.308953 |              |
| C            | 2.604717  | -0.121564             | -2.655303 |              |
| C            | 2.912479  | -1.039303             | -3.658047 |              |
| C            | 3.453329  | -2.287984             | -3.325910 |              |
| C            | 3.696972  | -2.610278             | -1.988849 |              |
| C            | 3.402398  | -1.689564             | -0.978894 |              |
| C            | 0.000423  | -2.653015             | -0.294043 |              |
| C            | 0.000514  | -2.153409             | -1.599475 |              |
| C            | 0.000943  | -3.030189             | -2.685054 |              |
| C            | 0.001269  | -4.410946             | -2.464513 |              |
| C            | 0.001162  | -4.910317             | -1.157365 |              |
| C            | 0.000737  | -4.033551             | -0.065872 |              |
| H            | -4.767174 | 0.928945              | 1.542920  |              |
| H            | -5.442553 | -0.064179             | 3.719610  |              |
| H            | -3.874258 | -1.565346             | 4.947078  |              |
| H            | -1.637590 | -2.099685             | 3.966988  |              |
| H            | -1.889523 | 3.374403              | 0.973853  |              |
| H            | -3.242788 | 5.462541              | 0.854866  |              |
| H            | -5.367428 | 5.495818              | -0.449448 |              |
| H            | -6.144916 | 3.435596              | -1.616091 |              |
| H            | -4.808392 | 1.343085              | -1.472466 |              |
| H            | -2.145929 | 0.837620              | -2.905650 |              |
| H            | -2.713026 | -0.789420             | -4.701541 |              |
| H            | -3.674094 | -3.013277             | -4.111526 |              |
| H            | -4.110137 | -3.586116             | -1.726382 |              |
| H            | -3.584231 | -1.949203             | 0.064609  |              |
| H            | 4.766695  | 0.929879              | 1.543338  |              |
| H            | 5.442241  | -0.063494             | 3.719868  |              |
| H            | 3.874270  | -1.565315             | 4.946967  |              |
| H            | 1.637706  | -2.099880             | 3.966755  |              |
| H            | 1.888583  | 3.374446              | 0.974873  |              |
| H            | 3.241007  | 5.463122              | 0.856117  |              |
| H            | 5.365401  | 5.497527              | -0.448579 |              |
| H            | 6.143506  | 3.437848              | -1.615776 |              |
| H            | 4.807835  | 1.344792              | -1.472378 |              |
| H            | 2.145799  | 0.838160              | -2.905429 |              |
| H            | 2.713845  | -0.788484             | -4.701378 |              |
| H            | 3.675979  | -3.011901             | -4.111418 |              |
| H            | 4.112090  | -3.584673             | -1.726276 |              |
| H            | 3.585195  | -1.948151             | 0.064778  |              |
| H            | 0.000227  | -1.073106             | -1.767221 |              |
| H            | 0.001023  | -2.632613             | -3.700629 |              |
| H            | 0.001608  | -5.099499             | -3.311688 |              |
| H            | 0.001404  | -5.988522             | -0.983888 |              |
| H            | 0.000644  | -4.411016             | 0.955780  |              |
| Complex Atom | X         | $9\text{---F}^-$<br>Y | Z         |              |
| Pt           | 1.669220  | 0.000042              | -0.263783 |              |
| Sb           | -0.764757 | -0.000057             | -1.670738 |              |
| Cl           | 2.132865  | 0.000090              | -2.683287 |              |
| Cl           | -5.744792 | -0.000187             | -2.548328 |              |

| Journal Name |           |           | ARTICLE   |
|--------------|-----------|-----------|-----------|
| Cl           | -7.474543 | -0.000120 | 0.115063  |
| Cl           | -6.010598 | -0.000018 | 2.910985  |
| Cl           | -2.859397 | 0.000020  | 3.026867  |
| P            | 1.511871  | -2.318799 | -0.126812 |
| F            | -0.796850 | -0.000070 | -3.682713 |
| O            | -2.828205 | -0.000128 | -2.039442 |
| O            | -1.579986 | -0.000052 | 0.304815  |
| C            | -3.582071 | -0.000112 | -0.936925 |
| C            | -4.980692 | -0.000133 | -0.987415 |
| C            | -5.741269 | -0.000105 | 0.199162  |
| C            | -5.088865 | -0.000059 | 1.440038  |
| C            | -3.678684 | -0.000043 | 1.496936  |
| C            | -2.915835 | -0.000068 | 0.320090  |
| C            | -0.657305 | -2.162516 | -1.897166 |
| C            | -1.659793 | -2.706945 | -2.706228 |
| C            | -1.640332 | -4.072779 | -3.001555 |
| C            | -0.616869 | -4.885703 | -2.504504 |
| C            | 0.369306  | -4.339570 | -1.685264 |
| C            | 0.351308  | -2.970445 | -1.365376 |
| C            | 3.098516  | -3.176012 | -0.331470 |
| C            | 4.145172  | -2.505330 | -0.985960 |
| C            | 5.373208  | -3.143074 | -1.172905 |
| C            | 5.564533  | -4.448078 | -0.708111 |
| C            | 4.525806  | -5.117653 | -0.051709 |
| C            | 3.296382  | -4.485743 | 0.140790  |
| C            | 0.806689  | -2.913820 | 1.437791  |
| C            | 1.634032  | -3.134390 | 2.550647  |
| C            | 1.067850  | -3.442425 | 3.786662  |
| C            | -0.322118 | -3.525013 | 3.923260  |
| C            | -1.146736 | -3.303064 | 2.816963  |
| C            | -0.586990 | -2.997126 | 1.575573  |
| C            | 1.712195  | 0.000015  | 1.767201  |
| C            | 3.011414  | 0.000042  | 2.296752  |
| C            | 3.194059  | 0.000020  | 3.686625  |
| C            | 2.087653  | -0.000041 | 4.540366  |
| C            | 0.797446  | -0.000083 | 4.000269  |
| C            | 0.607904  | -0.000054 | 2.616830  |
| P            | 1.511690  | 2.318862  | -0.126818 |
| C            | -0.657464 | 2.162409  | -1.897179 |
| C            | -1.659982 | 2.706761  | -2.706256 |
| C            | -1.640604 | 4.072590  | -3.001613 |
| C            | -0.617191 | 4.885586  | -2.504578 |
| C            | 0.369013  | 4.339530  | -1.685319 |
| C            | 0.351095  | 2.970413  | -1.365399 |
| C            | 3.098265  | 3.176212  | -0.331477 |
| C            | 4.144982  | 2.505627  | -0.985965 |
| C            | 5.372964  | 3.143475  | -1.172901 |
| C            | 5.564171  | 4.448498  | -0.708112 |
| C            | 4.525376  | 5.117988  | -0.051731 |
| C            | 3.296007  | 4.485969  | 0.140763  |
| C            | 0.806454  | 2.913845  | 1.437778  |
| C            | 1.633769  | 3.134432  | 2.550653  |
| C            | 1.067555  | 3.442446  | 3.786658  |
| C            | -0.322418 | 3.524989  | 3.923232  |
| C            | -1.147010 | 3.303013  | 2.816921  |
| C            | -0.587230 | 2.997100  | 1.575539  |
| H            | -2.444337 | -2.067260 | -3.107546 |
| H            | -2.422031 | -4.496084 | -3.634439 |
| H            | -0.589736 | -5.948326 | -2.749479 |
| H            | 1.158940  | -4.978044 | -1.287270 |
| H            | 3.990597  | -1.490072 | -1.354478 |
| H            | 6.183500  | -2.616635 | -1.679581 |

| ARTICLE |           |           |           | Journal Name |
|---------|-----------|-----------|-----------|--------------|
| H       | 6.526222  | -4.943301 | -0.851978 |              |
| H       | 4.673967  | -6.133728 | 0.317036  |              |
| H       | 2.498357  | -5.004677 | 0.673113  |              |
| H       | 2.715778  | -3.041330 | 2.457695  |              |
| H       | 1.715040  | -3.603823 | 4.649886  |              |
| H       | -0.762049 | -3.756726 | 4.894679  |              |
| H       | -2.231344 | -3.356088 | 2.919581  |              |
| H       | -1.236992 | -2.802347 | 0.722673  |              |
| H       | 3.885166  | 0.000067  | 1.638801  |              |
| H       | 4.206904  | 0.000044  | 4.095340  |              |
| H       | 2.231751  | -0.000064 | 5.622466  |              |
| H       | -0.072361 | -0.000139 | 4.660363  |              |
| H       | -0.393939 | -0.000092 | 2.195910  |              |
| H       | -2.444484 | 2.067018  | -3.107565 |              |
| H       | -2.422328 | 4.495834  | -3.634507 |              |
| H       | -0.590118 | 5.948204  | -2.749579 |              |
| H       | 1.158608  | 4.978060  | -1.287337 |              |
| H       | 3.990493  | 1.490361  | -1.354495 |              |
| H       | 6.183306  | 2.617103  | -1.679566 |              |
| H       | 6.525819  | 4.943804  | -0.851971 |              |
| H       | 4.673439  | 6.134083  | 0.316997  |              |
| H       | 2.497929  | 5.004841  | 0.673068  |              |
| H       | 2.715519  | 3.041402  | 2.457722  |              |
| H       | 1.714724  | 3.603859  | 4.649894  |              |
| H       | -0.762374 | 3.756685  | 4.894644  |              |
| H       | -2.231621 | 3.356000  | 2.919520  |              |
| H       | -1.237210 | 2.802300  | 0.722627  |              |
| Complex |           | 10-F      |           |              |
| Atom    | X         | Y         | Z         |              |
| Sb      | -0.606538 | 0.083121  | -0.353181 |              |
| F       | -0.436270 | 0.609774  | -2.371702 |              |
| C       | 1.553800  | -0.013554 | -0.446459 |              |
| C       | 2.182010  | -1.271408 | -0.332252 |              |
| C       | 1.468577  | -2.508310 | -0.272911 |              |
| C       | 2.119007  | -3.711508 | -0.139069 |              |
| C       | 3.539494  | -3.763292 | -0.059173 |              |
| C       | 4.271377  | -2.602512 | -0.120852 |              |
| C       | 3.631142  | -1.331954 | -0.255981 |              |
| C       | 4.371442  | -0.145462 | -0.303922 |              |
| C       | 3.752616  | 1.103444  | -0.434071 |              |
| C       | 4.520848  | 2.307724  | -0.481845 |              |
| C       | 3.912415  | 3.532688  | -0.607161 |              |
| C       | 2.494145  | 3.613749  | -0.699580 |              |
| C       | 1.720884  | 2.478071  | -0.656288 |              |
| C       | 2.303747  | 1.180448  | -0.514217 |              |
| C       | -1.888154 | -1.506131 | -1.023641 |              |
| C       | -2.175280 | -2.577048 | -0.167676 |              |
| C       | -3.038503 | -3.593629 | -0.588376 |              |
| C       | -3.623752 | -3.535454 | -1.857158 |              |
| C       | -3.338397 | -2.463143 | -2.708560 |              |
| C       | -2.466731 | -1.448827 | -2.297927 |              |
| C       | -0.710716 | -0.411152 | 1.782773  |              |
| C       | -1.970877 | -0.486732 | 2.396898  |              |
| C       | -2.081375 | -0.745845 | 3.765885  |              |
| C       | -0.927254 | -0.926328 | 4.537727  |              |
| C       | 0.331734  | -0.843702 | 3.936163  |              |
| C       | 0.437921  | -0.586060 | 2.563289  |              |
| C       | -1.651493 | 1.940299  | -0.119860 |              |
| C       | -1.608543 | 2.605473  | 1.111635  |              |
| C       | -2.298520 | 3.811107  | 1.273885  |              |
| C       | -3.044588 | 4.339566  | 0.215433  |              |
| C       | -3.091674 | 3.668067  | -1.011046 |              |

|         |           |                           |           |
|---------|-----------|---------------------------|-----------|
| C       | -2.387759 | 2.472025                  | -1.185827 |
| H       | 0.381080  | -2.506908                 | -0.351221 |
| H       | 1.541507  | -4.636487                 | -0.098923 |
| H       | 4.040459  | -4.726777                 | 0.046442  |
| H       | 5.362068  | -2.626845                 | -0.066492 |
| H       | 5.461217  | -0.194842                 | -0.234975 |
| H       | 5.608335  | 2.228259                  | -0.416597 |
| H       | 4.510177  | 4.444856                  | -0.642060 |
| H       | 2.016125  | 4.588390                  | -0.811516 |
| H       | 0.638881  | 2.569807                  | -0.747809 |
| H       | -1.729938 | -2.626893                 | 0.827254  |
| H       | -3.253492 | -4.430039                 | 0.079094  |
| H       | -4.300136 | -4.327559                 | -2.183234 |
| H       | -3.791836 | -2.415631                 | -3.700476 |
| H       | -2.221551 | -0.622413                 | -2.963489 |
| H       | -2.880777 | -0.340189                 | 1.808311  |
| H       | -3.067296 | -0.805365                 | 4.231362  |
| H       | -1.011052 | -1.127899                 | 5.607291  |
| H       | 1.235013  | -0.978099                 | 4.534856  |
| H       | 1.427256  | -0.519292                 | 2.106991  |
| H       | -1.038226 | 2.191095                  | 1.944247  |
| H       | -2.254114 | 4.335208                  | 2.230337  |
| H       | -3.588221 | 5.276998                  | 0.345717  |
| H       | -3.674072 | 4.078244                  | -1.838262 |
| H       | -2.396814 | 1.961602                  | -2.148321 |
| Complex |           | $4\text{CH}_3\text{-F}^-$ |           |
| Atom    | X         | Y                         | Z         |
| Te      | 1.764242  | 0.294919                  | -0.254142 |
| F       | -0.555287 | -0.194358                 | -1.194347 |
| C       | -0.754832 | 3.920554                  | -0.559322 |
| C       | -0.964570 | 1.653134                  | 0.388458  |
| C       | -0.031800 | 1.337435                  | 2.787427  |
| C       | 4.186036  | -0.771544                 | 1.308726  |
| C       | 1.326245  | -1.774087                 | -0.025177 |
| C       | -0.835873 | -1.113346                 | 1.169671  |
| C       | 0.235805  | -2.038421                 | 0.875451  |
| C       | 3.843886  | 0.100888                  | 0.268848  |
| C       | -0.394233 | 2.179243                  | 1.584322  |
| C       | 6.145033  | 0.820742                  | 0.095970  |
| C       | 4.814741  | 0.910946                  | -0.328634 |
| B       | -1.336987 | 0.069545                  | 0.096602  |
| C       | -1.116628 | 2.572833                  | -0.694063 |
| C       | 0.244406  | -3.352026                 | 1.467701  |
| C       | 0.978353  | -4.405307                 | 0.815051  |
| C       | -0.228410 | 4.436251                  | 0.627638  |
| C       | 6.496965  | -0.063159                 | 1.120828  |
| C       | -0.051646 | 3.538369                  | 1.682638  |
| C       | -1.662611 | -1.439878                 | 2.250964  |
| C       | -0.514565 | -3.562869                 | 2.666847  |
| C       | 5.516592  | -0.854623                 | 1.729172  |
| C       | -1.660689 | 2.174059                  | -2.051219 |
| C       | 1.928764  | -4.108049                 | -0.157233 |
| C       | -1.453310 | -2.608730                 | 3.046175  |
| C       | 0.119658  | 5.896558                  | 0.767633  |
| C       | 2.181594  | -2.747645                 | -0.521848 |
| C       | -3.221102 | -1.524245                 | -0.899559 |
| C       | 2.038110  | 0.564696                  | -2.369722 |
| C       | -2.193422 | -2.616325                 | -1.122026 |
| C       | -2.917930 | -0.261418                 | -0.302254 |
| C       | -4.529877 | -1.851500                 | -1.286644 |
| C       | -5.607803 | -0.984323                 | -1.091364 |
| C       | -5.326044 | 0.236923                  | -0.480231 |

| ARTICLE |           |                                      |           | Journal Name |
|---------|-----------|--------------------------------------|-----------|--------------|
| C       | -4.025612 | 0.611255                             | -0.094627 |              |
| C       | -3.937760 | 1.991246                             | 0.528091  |              |
| C       | -7.003422 | -1.346888                            | -1.533908 |              |
| C       | 3.314811  | -2.481314                            | -1.476544 |              |
| C       | 2.720430  | -5.196939                            | -0.841335 |              |
| C       | 0.603287  | -5.856417                            | 1.041400  |              |
| C       | -0.185604 | -4.702507                            | 3.611823  |              |
| C       | -2.293782 | -2.810309                            | 4.286046  |              |
| C       | -2.793747 | -0.534314                            | 2.669644  |              |
| H       | -0.894421 | 4.590431                             | -1.414402 |              |
| H       | -0.905946 | 0.901816                             | 3.286021  |              |
| H       | 0.506722  | 1.949715                             | 3.524380  |              |
| H       | 0.614560  | 0.488500                             | 2.515712  |              |
| H       | 3.426839  | -1.402016                            | 1.775638  |              |
| H       | 6.905697  | 1.444018                             | -0.377400 |              |
| H       | 4.554378  | 1.610207                             | -1.125650 |              |
| H       | 7.535671  | -0.133517                            | 1.447641  |              |
| H       | 0.391618  | 3.900397                             | 2.615824  |              |
| H       | 5.787054  | -1.543330                            | 2.531548  |              |
| H       | -2.076295 | 3.053341                             | -2.565046 |              |
| H       | -2.437047 | 1.403575                             | -1.977186 |              |
| H       | -0.869470 | 1.756054                             | -2.691102 |              |
| H       | 0.911938  | 6.050029                             | 1.514569  |              |
| H       | -0.755201 | 6.483299                             | 1.094480  |              |
| H       | 0.456275  | 6.322598                             | -0.188799 |              |
| H       | 3.107177  | 0.603505                             | -2.600670 |              |
| H       | 1.544375  | 1.510197                             | -2.615244 |              |
| H       | 1.542691  | -0.274742                            | -2.864382 |              |
| H       | -1.989119 | -3.156645                            | -0.184525 |              |
| H       | -1.233336 | -2.228575                            | -1.476318 |              |
| H       | -2.573881 | -3.348737                            | -1.849246 |              |
| H       | -4.710714 | -2.828961                            | -1.746766 |              |
| H       | -6.147936 | 0.935559                             | -0.291061 |              |
| H       | -4.915228 | 2.271778                             | 0.947339  |              |
| H       | -3.670287 | 2.752008                             | -0.221692 |              |
| H       | -3.183822 | 2.074128                             | 1.317848  |              |
| H       | -7.218203 | -2.411468                            | -1.356914 |              |
| H       | -7.139292 | -1.166122                            | -2.613396 |              |
| H       | -7.758763 | -0.749110                            | -1.003773 |              |
| H       | 4.279900  | -2.788628                            | -1.045252 |              |
| H       | 3.177666  | -3.058865                            | -2.403464 |              |
| H       | 3.407208  | -1.430124                            | -1.754264 |              |
| H       | 2.632209  | -6.158955                            | -0.326802 |              |
| H       | 2.392466  | -5.342173                            | -1.884923 |              |
| H       | 3.789121  | -4.942737                            | -0.880759 |              |
| H       | -0.380435 | -5.946992                            | 1.511145  |              |
| H       | 0.548992  | -6.374388                            | 0.073519  |              |
| H       | 1.327061  | -6.409709                            | 1.660717  |              |
| H       | -0.145885 | -4.322251                            | 4.642663  |              |
| H       | -0.924423 | -5.520167                            | 3.601594  |              |
| H       | 0.795758  | -5.135663                            | 3.393886  |              |
| H       | -3.354261 | -2.607291                            | 4.078576  |              |
| H       | -2.224999 | -3.831451                            | 4.675204  |              |
| H       | -1.995892 | -2.122258                            | 5.095971  |              |
| H       | -3.777956 | -0.974468                            | 2.439758  |              |
| H       | -2.770540 | -0.354082                            | 3.755781  |              |
| H       | -2.742538 | 0.433015                             | 2.169874  |              |
| Complex |           | <b>4CN<sup>3-</sup>F<sup>-</sup></b> |           |              |
| Atom    | X         | Y                                    | Z         |              |
| Te      | 1.618915  | 0.554988                             | -0.417224 |              |
| F       | -0.800503 | -0.251177                            | -1.189550 |              |
| C       | -0.180549 | 3.608935                             | -0.652385 |              |



| Journal Name |           |           | ARTICLE   |
|--------------|-----------|-----------|-----------|
| C            | -1.053814 | 1.581938  | 0.425070  |
| C            | -0.493274 | 1.256826  | 2.926406  |
| C            | 4.075663  | -0.372907 | 1.180941  |
| C            | 1.214583  | -1.551303 | -0.047461 |
| C            | -1.002006 | -1.134319 | 1.119036  |
| C            | 0.163003  | -1.949498 | 0.847496  |
| C            | 3.704324  | 0.320899  | 0.023445  |
| C            | -0.431198 | 2.021354  | 1.626159  |
| C            | 6.004103  | 0.895047  | -0.410906 |
| C            | 4.655006  | 0.971283  | -0.768356 |
| B            | -1.547918 | 0.049868  | 0.091708  |
| C            | -0.982146 | 2.459769  | -0.698018 |
| C            | 0.282976  | -3.263032 | 1.443698  |
| C            | 1.190678  | -4.217308 | 0.886095  |
| C            | 0.533755  | 3.973512  | 0.494835  |
| C            | 6.390856  | 0.180221  | 0.727521  |
| C            | 0.346627  | 3.188719  | 1.637276  |
| C            | -1.830833 | -1.556441 | 2.166668  |
| C            | -0.531705 | -3.587624 | 2.569497  |
| C            | 5.428598  | -0.449225 | 1.523527  |
| C            | -1.713089 | 2.203278  | -1.999467 |
| C            | 2.064490  | -3.843417 | -0.134268 |
| C            | -1.553579 | -2.712311 | 2.950010  |
| C            | 1.411869  | 5.196395  | 0.516719  |
| C            | 2.128989  | -2.476008 | -0.542014 |
| C            | -3.519779 | -1.480115 | -0.784099 |
| C            | 1.782983  | 0.535190  | -2.558291 |
| C            | -2.549384 | -2.613887 | -1.047638 |
| C            | -3.135469 | -0.236342 | -0.201294 |
| C            | -4.858288 | -1.731068 | -1.119977 |
| C            | -5.869872 | -0.795797 | -0.890139 |
| C            | -5.499898 | 0.409743  | -0.286904 |
| C            | -4.173611 | 0.701903  | 0.061952  |
| C            | -3.951901 | 2.032248  | 0.744869  |
| C            | -7.297647 | -1.068226 | -1.287181 |
| C            | 3.146983  | -2.159452 | -1.492698 |
| N            | 3.968952  | -2.004354 | -2.303713 |
| C            | 2.920371  | -4.805326 | -0.743815 |
| N            | 3.624142  | -5.583802 | -1.249598 |
| C            | 1.197767  | -5.597020 | 1.251273  |
| N            | 1.245318  | -6.746030 | 1.438612  |
| C            | -0.319345 | -4.731916 | 3.390974  |
| N            | -0.187084 | -5.604709 | 4.152553  |
| C            | -2.348471 | -3.011470 | 4.095851  |
| N            | -2.994556 | -3.253083 | 5.034707  |
| C            | -3.009043 | -0.843334 | 2.559254  |
| N            | -3.937945 | -0.346263 | 3.059729  |
| H            | -0.110029 | 4.236344  | -1.546334 |
| H            | -1.522510 | 0.992793  | 3.201567  |
| H            | -0.078113 | 1.864716  | 3.741262  |
| H            | 0.089811  | 0.324088  | 2.891849  |
| H            | 3.332653  | -0.866320 | 1.810339  |
| H            | 6.753242  | 1.391182  | -1.029636 |
| H            | 4.366039  | 1.524937  | -1.663033 |
| H            | 7.446020  | 0.116182  | 0.996892  |
| H            | 0.850101  | 3.475103  | 2.565007  |
| H            | 5.727584  | -1.002768 | 2.414768  |
| H            | -2.087218 | 3.155040  | -2.404904 |
| H            | -2.557324 | 1.517046  | -1.873819 |
| H            | -1.049967 | 1.763266  | -2.758763 |
| H            | 0.828490  | 6.092764  | 0.784353  |
| H            | 1.861936  | 5.381732  | -0.468638 |

| ARTICLE |                                        |           |           | Journal Name |
|---------|----------------------------------------|-----------|-----------|--------------|
| H       | 2.217465                               | 5.095941  | 1.257283  |              |
| H       | 2.788579                               | 0.220138  | -2.845561 |              |
| H       | 1.569983                               | 1.565188  | -2.863286 |              |
| H       | 1.011281                               | -0.149816 | -2.919734 |              |
| H       | -2.353136                              | -3.189366 | -0.127938 |              |
| H       | -1.586484                              | -2.264943 | -1.434121 |              |
| H       | -2.978261                              | -3.320123 | -1.772019 |              |
| H       | -5.115906                              | -2.694018 | -1.571744 |              |
| H       | -6.274388                              | 1.150384  | -0.065293 |              |
| H       | -4.915129                              | 2.444166  | 1.077436  |              |
| H       | -3.489016                              | 2.768488  | 0.071618  |              |
| H       | -3.296266                              | 1.948594  | 1.619196  |              |
| H       | -7.513738                              | -2.146042 | -1.293096 |              |
| H       | -7.502741                              | -0.687465 | -2.301644 |              |
| H       | -8.004649                              | -0.573264 | -0.605921 |              |
| Complex | <b>4NO<sub>2</sub>···F<sup>-</sup></b> |           |           |              |
| Atom    | X                                      | Y         | Z         |              |
| Te      | 1.787356                               | 0.528667  | -0.174215 |              |
| F       | -0.555245                              | -0.263735 | -1.114566 |              |
| C       | -0.684741                              | 3.849616  | -0.622847 |              |
| C       | -0.996584                              | 1.630057  | 0.385861  |              |
| C       | -0.117424                              | 1.324990  | 2.800691  |              |
| C       | 4.220948                               | -0.439586 | 1.349599  |              |
| C       | 1.331866                               | -1.592133 | 0.067762  |              |
| C       | -0.893896                              | -1.078963 | 1.217645  |              |
| C       | 0.282921                               | -1.911734 | 1.002304  |              |
| C       | 3.878938                               | 0.192151  | 0.145614  |              |
| C       | -0.424032                              | 2.157525  | 1.580010  |              |
| C       | 6.208166                               | 0.426430  | -0.424905 |              |
| C       | 4.862651                               | 0.640288  | -0.740169 |              |
| B       | -1.389097                              | 0.061689  | 0.099467  |              |
| C       | -1.114232                              | 2.519145  | -0.725046 |              |
| C       | 0.409582                               | -3.166175 | 1.688152  |              |
| C       | 1.257858                               | -4.178289 | 1.149776  |              |
| C       | -0.133587                              | 4.367431  | 0.551237  |              |
| C       | 6.559012                               | -0.225636 | 0.760803  |              |
| C       | -0.015164                              | 3.497609  | 1.639696  |              |
| C       | -1.754188                              | -1.519280 | 2.220173  |              |
| C       | -0.348589                              | -3.367776 | 2.879711  |              |
| C       | 5.567078                               | -0.655607 | 1.648699  |              |
| C       | -1.687033                              | 2.110744  | -2.066323 |              |
| C       | 2.189291                               | -3.872453 | 0.183282  |              |
| C       | -1.462241                              | -2.579398 | 3.098347  |              |
| C       | 0.298001                               | 5.807085  | 0.649262  |              |
| C       | 2.248768                               | -2.552700 | -0.318306 |              |
| C       | -3.230122                              | -1.592915 | -0.839154 |              |
| C       | 1.848499                               | 1.004019  | -2.255910 |              |
| C       | -2.191533                              | -2.680227 | -1.031980 |              |
| C       | -2.947328                              | -0.309243 | -0.277754 |              |
| C       | -4.534793                              | -1.940754 | -1.210918 |              |
| C       | -5.617224                              | -1.075653 | -1.030394 |              |
| C       | -5.348172                              | 0.168688  | -0.457887 |              |
| C       | -4.055090                              | 0.568140  | -0.086461 |              |
| C       | -3.959419                              | 1.958085  | 0.501042  |              |
| C       | -7.010175                              | -1.463446 | -1.452089 |              |
| N       | 3.275983                               | -2.269896 | -1.354848 |              |
| O       | 2.899732                               | -1.640556 | -2.344015 |              |
| O       | 4.407908                               | -2.711649 | -1.171763 |              |
| N       | 3.075229                               | -4.919710 | -0.412405 |              |
| O       | 2.701664                               | -5.385842 | -1.486478 |              |
| O       | 4.099964                               | -5.187455 | 0.195485  |              |
| N       | 0.933247                               | -5.611096 | 1.408617  |              |

| Journal Name |                                     |           |           | ARTICLE |
|--------------|-------------------------------------|-----------|-----------|---------|
| O            | -0.251058                           | -5.870950 | 1.624237  |         |
| O            | 1.838376                            | -6.435654 | 1.323995  |         |
| N            | 0.177112                            | -4.219869 | 3.955523  |         |
| O            | -0.470474                           | -4.294733 | 5.002311  |         |
| O            | 1.280446                            | -4.755166 | 3.783769  |         |
| N            | -3.085879                           | -0.886904 | 2.463976  |         |
| O            | -4.062522                           | -1.636085 | 2.392860  |         |
| O            | -3.109954                           | 0.288249  | 2.822648  |         |
| N            | -2.382903                           | -2.818311 | 4.248194  |         |
| O            | -3.112831                           | -3.797824 | 4.176502  |         |
| O            | -2.377055                           | -1.962030 | 5.130106  |         |
| H            | -0.789435                           | 4.501929  | -1.495190 |         |
| H            | -1.014695                           | 0.869813  | 3.234250  |         |
| H            | 0.361023                            | 1.942794  | 3.572209  |         |
| H            | 0.585622                            | 0.504383  | 2.574720  |         |
| H            | 3.454217                            | -0.780069 | 2.048837  |         |
| H            | 6.981243                            | 0.767959  | -1.114468 |         |
| H            | 4.607228                            | 1.149075  | -1.669379 |         |
| H            | 7.610292                            | -0.397334 | 0.995818  |         |
| H            | 0.436003                            | 3.866497  | 2.565148  |         |
| H            | 5.838572                            | -1.161194 | 2.576211  |         |
| H            | -2.163743                           | 2.975738  | -2.548955 |         |
| H            | -2.421797                           | 1.303017  | -1.982844 |         |
| H            | -0.899357                           | 1.753354  | -2.745898 |         |
| H            | -0.522354                           | 6.435979  | 1.032992  |         |
| H            | 0.584955                            | 6.207010  | -0.333383 |         |
| H            | 1.147021                            | 5.924663  | 1.337637  |         |
| H            | 2.826451                            | 0.740884  | -2.663203 |         |
| H            | 1.654903                            | 2.082375  | -2.292276 |         |
| H            | 1.042696                            | 0.432287  | -2.719718 |         |
| H            | -2.036634                           | -3.248754 | -0.100124 |         |
| H            | -1.220807                           | -2.293123 | -1.354991 |         |
| H            | -2.539707                           | -3.404328 | -1.781402 |         |
| H            | -4.711462                           | -2.930836 | -1.642242 |         |
| H            | -6.176467                           | 0.863557  | -0.289575 |         |
| H            | -4.941337                           | 2.264472  | 0.888226  |         |
| H            | -3.660617                           | 2.694450  | -0.261018 |         |
| H            | -3.226656                           | 2.030739  | 1.309946  |         |
| H            | -7.184828                           | -2.540664 | -1.317396 |         |
| H            | -7.173313                           | -1.239132 | -2.519420 |         |
| H            | -7.769812                           | -0.910964 | -0.881409 |         |
| Complex      | <b>4OH<sup>+</sup>F<sup>-</sup></b> |           |           |         |
| Atom         | X                                   | Y         | Z         |         |
| Te           | 1.502089                            | 0.288205  | -0.767480 |         |
| F            | -0.895455                           | -0.333732 | -1.270979 |         |
| C            | -0.175813                           | 3.561006  | -0.393938 |         |
| H            | -0.178411                           | 4.297976  | -1.203704 |         |
| C            | -0.975434                           | 1.410975  | 0.491370  |         |
| C            | -0.284403                           | 0.825404  | 2.913955  |         |
| H            | -1.297060                           | 0.468810  | 3.143980  |         |
| H            | 0.087038                            | 1.388906  | 3.781994  |         |
| H            | 0.347994                            | -0.067078 | 2.797743  |         |
| C            | 3.967219                            | 0.255608  | 1.063542  |         |
| H            | 3.242952                            | -0.150396 | 1.773425  |         |
| C            | 1.310632                            | -1.677907 | 0.011657  |         |
| C            | -1.021436                           | -1.334476 | 1.033750  |         |
| C            | 0.210985                            | -2.075000 | 0.866683  |         |
| C            | 3.601223                            | 0.483284  | -0.273062 |         |
| C            | -0.259486                           | 1.707224  | 1.684546  |         |
| C            | 5.832632                            | 1.285481  | -0.757135 |         |
| H            | 6.558464                            | 1.686215  | -1.466429 |         |
| C            | 4.528452                            | 1.012185  | -1.183069 |         |

| ARTICLE |           |           | Journal Name |
|---------|-----------|-----------|--------------|
| H       | 4.250338  | 1.201094  | -2.221061    |
| B       | -1.546153 | -0.079535 | 0.089881     |
| C       | -0.970806 | 2.414117  | -0.521486    |
| C       | 0.409012  | -3.335316 | 1.581003     |
| C       | 1.531014  | -4.181832 | 1.311442     |
| C       | 0.634258  | 3.782910  | 0.725358     |
| C       | 6.203387  | 1.045292  | 0.569379     |
| H       | 7.221980  | 1.259175  | 0.896540     |
| C       | 0.537811  | 2.860855  | 1.771144     |
| H       | 1.105664  | 3.038922  | 2.689729     |
| C       | -1.897835 | -1.807545 | 2.009698     |
| C       | -0.551941 | -3.726827 | 2.551323     |
| C       | 5.271924  | 0.530925  | 1.478582     |
| H       | 5.560647  | 0.343994  | 2.514071     |
| C       | -1.747084 | 2.281947  | -1.814972    |
| H       | -2.022225 | 3.278008  | -2.191980    |
| H       | -2.656962 | 1.683351  | -1.695292    |
| H       | -1.143877 | 1.788975  | -2.593219    |
| C       | 2.494344  | -3.790270 | 0.396276     |
| C       | -1.664813 | -2.959022 | 2.786805     |
| C       | 1.563247  | 4.966847  | 0.802848     |
| H       | 1.727936  | 5.281461  | 1.843274     |
| H       | 1.170649  | 5.823623  | 0.236482     |
| H       | 2.549341  | 4.718314  | 0.376675     |
| C       | 2.399656  | -2.524406 | -0.212623    |
| C       | -3.654318 | -1.255879 | -1.021724    |
| C       | 1.777912  | -0.211862 | -2.843816    |
| H       | 2.479221  | -1.044890 | -2.933913    |
| H       | 2.134865  | 0.688173  | -3.355647    |
| H       | 0.776189  | -0.484110 | -3.190138    |
| C       | -2.757034 | -2.363199 | -1.531164    |
| H       | -2.016698 | -2.666320 | -0.780125    |
| H       | -2.190094 | -2.040077 | -2.416279    |
| H       | -3.358881 | -3.239203 | -1.812528    |
| C       | -3.169083 | -0.178349 | -0.216915    |
| C       | -5.006538 | -1.333726 | -1.375934    |
| H       | -5.341376 | -2.175956 | -1.990152    |
| C       | -5.945729 | -0.383928 | -0.956155    |
| C       | -5.488353 | 0.644477  | -0.132472    |
| H       | -6.203546 | 1.382141  | 0.244237     |
| C       | -4.137993 | 0.762132  | 0.243648     |
| C       | -3.807885 | 1.914762  | 1.170247     |
| H       | -4.726287 | 2.283309  | 1.649149     |
| H       | -3.350501 | 2.753380  | 0.624725     |
| H       | -3.095460 | 1.634614  | 1.956119     |
| C       | -7.391586 | -0.479147 | -1.371410    |
| H       | -7.771794 | -1.506604 | -1.267845    |
| H       | -7.517724 | -0.195262 | -2.429032    |
| H       | -8.025073 | 0.187197  | -0.769703    |
| O       | 3.464367  | -2.269884 | -1.056532    |
| H       | 3.799460  | -1.352154 | -0.904474    |
| O       | 3.564498  | -4.603849 | 0.130544     |
| H       | 4.146496  | -4.079809 | -0.461949    |
| O       | 1.726944  | -5.390893 | 1.910416     |
| H       | 0.974640  | -5.544536 | 2.533766     |
| O       | -0.379942 | -4.895406 | 3.279564     |
| H       | -1.210937 | -5.084565 | 3.759878     |
| O       | -2.568733 | -3.379835 | 3.732309     |
| H       | -3.344232 | -2.784491 | 3.644096     |
| O       | -3.089189 | -1.208059 | 2.358903     |
| H       | -3.409933 | -0.695889 | 1.567143     |

Complex

 $5\text{CH}_3\text{H}^+\text{F}^-$

| Atom | X         | Y         | Z         |
|------|-----------|-----------|-----------|
| C    | 1.875001  | -1.588911 | 4.384443  |
| C    | 2.959651  | -1.336379 | 3.571232  |
| C    | 0.552167  | -1.461888 | 3.878248  |
| C    | 2.755435  | -0.891152 | 2.245226  |
| C    | 1.489203  | -0.682274 | 1.709835  |
| C    | 0.345557  | -1.032319 | 2.513693  |
| B    | 1.386298  | 0.038110  | 0.279826  |
| C    | -0.994464 | -0.988566 | 2.000391  |
| C    | -0.565446 | -1.759526 | 4.702435  |
| C    | -1.849253 | -1.662099 | 4.201808  |
| C    | -2.047830 | -1.298404 | 2.855508  |
| B    | -1.349927 | -0.742172 | 0.462101  |
| C    | 2.552242  | -0.443565 | -0.740884 |
| C    | 0.976136  | 1.611935  | 0.227116  |
| C    | -2.131294 | -2.068939 | -0.158888 |
| C    | -2.155454 | 0.665363  | 0.101445  |
| C    | 3.671919  | 0.385958  | -1.022181 |
| C    | 2.543545  | -1.733912 | -1.340350 |
| C    | 4.665949  | -0.030148 | -1.922687 |
| C    | 3.884644  | 1.733249  | -0.364164 |
| C    | 3.546549  | -2.109455 | -2.247822 |
| C    | 1.502789  | -2.782461 | -1.013718 |
| C    | 4.610852  | -1.264429 | -2.575720 |
| C    | 5.658345  | -1.671525 | -3.581606 |
| C    | 0.563581  | 2.162630  | -1.021666 |
| C    | 0.982937  | 2.493566  | 1.340741  |
| C    | 0.083379  | 3.474554  | -1.107233 |
| C    | 0.678475  | 1.414754  | -2.332347 |
| C    | 0.510171  | 3.810198  | 1.211424  |
| C    | 1.532176  | 2.128668  | 2.703174  |
| C    | 0.021927  | 4.315888  | 0.006134  |
| C    | -0.558841 | 5.701958  | -0.089644 |
| C    | -2.978624 | -1.860630 | -1.263806 |
| C    | -4.058607 | -2.678911 | -1.631217 |
| C    | -4.150790 | -3.921282 | -0.961852 |
| S    | -2.258253 | -0.552839 | -2.280944 |
| C    | -3.204075 | -4.271615 | 0.021189  |
| C    | -2.200030 | -3.357424 | 0.425738  |
| C    | -2.533352 | 0.903668  | -1.240170 |
| C    | -2.437463 | 1.736026  | 0.988645  |
| C    | -2.972958 | 2.123960  | -1.764204 |
| C    | -3.141121 | 2.887088  | 0.542790  |
| C    | -3.354489 | 3.110606  | -0.828324 |
| C    | -3.163726 | -0.465670 | -3.841203 |
| F    | -0.010058 | -0.650020 | -0.340766 |
| C    | -2.970484 | 2.481516  | -3.229856 |
| C    | -3.919654 | 4.406139  | -1.360735 |
| C    | -3.582054 | 3.905305  | 1.568974  |
| C    | -1.984014 | 1.761689  | 2.427796  |
| C    | -1.149363 | -3.855361 | 1.391444  |
| C    | -3.292171 | -5.628376 | 0.681564  |
| C    | -5.251943 | -4.888689 | -1.330954 |
| C    | -5.184004 | -2.244868 | -2.542555 |
| H    | 2.011740  | -1.908187 | 5.421175  |
| H    | 3.975759  | -1.461829 | 3.953244  |
| H    | 3.628824  | -0.664858 | 1.627736  |
| H    | -0.388108 | -2.074160 | 5.734337  |
| H    | -2.707503 | -1.892595 | 4.837432  |
| H    | -3.069259 | -1.273864 | 2.464861  |
| H    | 5.516530  | 0.633366  | -2.110440 |
| H    | 3.236098  | 2.509413  | -0.796957 |

| ARTICLE |                                                   |           |           | Journal Name |
|---------|---------------------------------------------------|-----------|-----------|--------------|
| H       | 3.663627                                          | 1.707965  | 0.711193  |              |
| H       | 4.929294                                          | 2.052879  | -0.491433 |              |
| H       | 3.504262                                          | -3.108878 | -2.693651 |              |
| H       | 0.548121                                          | -2.604889 | -1.529835 |              |
| H       | 1.865105                                          | -3.779379 | -1.303537 |              |
| H       | 1.276706                                          | -2.792940 | 0.060462  |              |
| H       | 6.621252                                          | -1.180307 | -3.379612 |              |
| H       | 5.816637                                          | -2.759985 | -3.578959 |              |
| H       | 5.356964                                          | -1.390000 | -4.604584 |              |
| H       | -0.253522                                         | 3.851018  | -2.078284 |              |
| H       | 0.388099                                          | 0.362794  | -2.259898 |              |
| H       | 0.060298                                          | 1.899274  | -3.102029 |              |
| H       | 1.720949                                          | 1.425172  | -2.690165 |              |
| H       | 0.517009                                          | 4.458421  | 2.093665  |              |
| H       | 1.510170                                          | 3.008987  | 3.361427  |              |
| H       | 0.965996                                          | 1.325429  | 3.193230  |              |
| H       | 2.570999                                          | 1.772620  | 2.644472  |              |
| H       | -1.646376                                         | 5.683698  | 0.088803  |              |
| H       | -0.117688                                         | 6.377724  | 0.657444  |              |
| H       | -0.403977                                         | 6.136313  | -1.088289 |              |
| H       | -4.107254                                         | 0.077193  | -3.773071 |              |
| H       | -2.483308                                         | 0.001055  | -4.558990 |              |
| H       | -3.321828                                         | -1.509332 | -4.131793 |              |
| H       | -2.257718                                         | 1.880211  | -3.801255 |              |
| H       | -3.959899                                         | 2.397603  | -3.705987 |              |
| H       | -2.652744                                         | 3.525929  | -3.346993 |              |
| H       | -3.128689                                         | 5.013571  | -1.831277 |              |
| H       | -4.683473                                         | 4.227359  | -2.131509 |              |
| H       | -4.371628                                         | 5.022161  | -0.577985 |              |
| H       | -4.426035                                         | 4.508406  | 1.216767  |              |
| H       | -3.893141                                         | 3.417108  | 2.501583  |              |
| H       | -2.765851                                         | 4.600625  | 1.829384  |              |
| H       | -2.758140                                         | 1.386677  | 3.117853  |              |
| H       | -1.097613                                         | 1.148772  | 2.577285  |              |
| H       | -1.735124                                         | 2.787392  | 2.725676  |              |
| H       | -1.524064                                         | -3.960079 | 2.421041  |              |
| H       | -0.798018                                         | -4.846231 | 1.065019  |              |
| H       | -0.287259                                         | -3.187272 | 1.426082  |              |
| H       | -4.334608                                         | -5.953276 | 0.792173  |              |
| H       | -2.773377                                         | -6.402023 | 0.089330  |              |
| H       | -2.838461                                         | -5.624935 | 1.679014  |              |
| H       | -5.658095                                         | -4.688411 | -2.328688 |              |
| H       | -4.881352                                         | -5.922057 | -1.330202 |              |
| H       | -6.091340                                         | -4.845774 | -0.615967 |              |
| H       | -5.117926                                         | -2.653459 | -3.563256 |              |
| H       | -6.138231                                         | -2.590974 | -2.124080 |              |
| H       | -5.252605                                         | -1.155314 | -2.607050 |              |
| Complex | <b>5H,CH<sub>3</sub><sup>+</sup>F<sup>-</sup></b> |           |           |              |
| Atom    | X                                                 | Y         | Z         |              |
| C       | 1.644632                                          | -2.064546 | 4.323265  |              |
| C       | 2.784520                                          | -1.895939 | 3.547168  |              |
| C       | 0.430532                                          | -1.406756 | 3.924590  |              |
| C       | 2.736878                                          | -1.098181 | 2.360504  |              |
| C       | 1.517532                                          | -0.719448 | 1.791447  |              |
| C       | 0.311687                                          | -0.942696 | 2.564529  |              |
| B       | 1.478469                                          | 0.011619  | 0.341807  |              |
| C       | -1.008230                                         | -0.672212 | 2.053699  |              |
| C       | -0.657163                                         | -1.185223 | 4.836851  |              |
| C       | -1.909355                                         | -0.840156 | 4.338239  |              |
| C       | -2.097697                                         | -0.686468 | 2.930742  |              |
| B       | -1.300866                                         | -0.534124 | 0.489990  |              |
| C       | 2.526140                                          | -0.580082 | -0.755158 |              |

| Journal Name | ARTICLE   |           |           |
|--------------|-----------|-----------|-----------|
| C            | 1.137101  | 1.598005  | 0.256578  |
| C            | -2.088676 | -1.817569 | -0.123993 |
| C            | -1.994353 | 0.844600  | 0.004097  |
| C            | 3.568992  | 0.195937  | -1.335271 |
| C            | 2.443995  | -1.943583 | -1.158362 |
| C            | 4.422525  | -0.356993 | -2.301868 |
| C            | 3.877609  | 1.628573  | -0.943270 |
| C            | 3.312519  | -2.458374 | -2.134706 |
| C            | 1.450904  | -2.927060 | -0.572432 |
| C            | 4.301660  | -1.679172 | -2.739109 |
| C            | 5.202763  | -2.239698 | -3.810780 |
| C            | 0.721003  | 2.159060  | -0.989146 |
| C            | 1.191538  | 2.483891  | 1.365810  |
| C            | 0.332304  | 3.499818  | -1.081105 |
| C            | 0.705041  | 1.398688  | -2.300002 |
| C            | 0.802860  | 3.827918  | 1.229454  |
| C            | 1.673992  | 2.081510  | 2.743248  |
| C            | 0.350022  | 4.357484  | 0.021099  |
| C            | -0.128265 | 5.781261  | -0.092209 |
| C            | -2.594515 | -1.819840 | -1.431323 |
| C            | -3.213313 | -2.922688 | -2.031225 |
| C            | -3.367236 | -4.086741 | -1.276943 |
| S            | -2.269918 | -0.360497 | -2.440200 |
| C            | -2.891669 | -4.130549 | 0.037863  |
| C            | -2.266810 | -3.013700 | 0.594289  |
| C            | -2.513967 | 1.003059  | -1.287363 |
| C            | -2.133933 | 1.956688  | 0.852730  |
| C            | -3.091958 | 2.186856  | -1.760677 |
| C            | -2.721265 | 3.145352  | 0.427638  |
| C            | -3.199328 | 3.264638  | -0.881939 |
| C            | -3.705975 | -0.263291 | -3.532809 |
| F            | 0.037267  | -0.621499 | -0.284294 |
| C            | 4.071135  | -0.691673 | 1.776579  |
| C            | 4.098887  | -2.530719 | 3.942052  |
| C            | 1.654981  | -3.041862 | 5.482691  |
| C            | -0.416618 | -1.146406 | 6.335356  |
| C            | -3.089884 | -0.627019 | 5.256766  |
| C            | -3.521724 | -0.509339 | 2.448320  |
| H            | 5.221731  | 0.267278  | -2.715258 |
| H            | 3.290176  | 2.350621  | -1.531102 |
| H            | 3.655704  | 1.846647  | 0.107663  |
| H            | 4.941297  | 1.842296  | -1.125164 |
| H            | 3.220976  | -3.512948 | -2.415939 |
| H            | 0.477731  | -2.877666 | -1.083877 |
| H            | 1.831249  | -3.953753 | -0.678911 |
| H            | 1.257798  | -2.730051 | 0.489195  |
| H            | 6.199529  | -1.775601 | -3.781428 |
| H            | 5.323182  | -3.327674 | -3.705027 |
| H            | 4.787959  | -2.053741 | -4.815769 |
| H            | -0.008869 | 3.882910  | -2.048198 |
| H            | 0.556953  | 0.323717  | -2.182747 |
| H            | -0.084803 | 1.796157  | -2.954480 |
| H            | 1.660944  | 1.528349  | -2.833408 |
| H            | 0.847519  | 4.478826  | 2.108730  |
| H            | 1.795449  | 2.976149  | 3.371315  |
| H            | 0.967692  | 1.404407  | 3.244401  |
| H            | 2.635735  | 1.552936  | 2.710475  |
| H            | -1.223113 | 5.815654  | -0.220292 |
| H            | 0.122009  | 6.362110  | 0.806725  |
| H            | 0.311303  | 6.288024  | -0.965061 |
| H            | -3.576617 | -2.896135 | -3.057404 |
| H            | -3.858068 | -4.953303 | -1.722004 |

| ARTICLE |           |   |                                   | Journal Name |
|---------|-----------|---|-----------------------------------|--------------|
| H       | -3.005023 |   | -5.043007                         | 0.626384     |
| H       | -1.895955 |   | -3.052388                         | 1.620635     |
| H       | -1.746251 |   | 1.871241                          | 1.868821     |
| H       | -3.457998 |   | 2.286447                          | -2.781311    |
| H       | -2.794399 |   | 3.992579                          | 1.111587     |
| H       | -3.653319 |   | 4.194557                          | -1.227080    |
| H       | -4.630911 |   | -0.263896                         | -2.947322    |
| H       | -3.594033 |   | 0.652779                          | -4.122000    |
| H       | -3.649001 |   | -1.119112                         | -4.213273    |
| H       | 4.793523  |   | -0.485866                         | 2.580623     |
| H       | 4.514304  |   | -1.470867                         | 1.134798     |
| H       | 3.987783  |   | 0.212195                          | 1.170669     |
| H       | 3.962263  |   | -3.374545                         | 4.627850     |
| H       | 4.653220  |   | -2.894302                         | 3.064877     |
| H       | 4.757053  |   | -1.807249                         | 4.453631     |
| H       | 0.639476  |   | -3.300030                         | 5.799417     |
| H       | 2.140755  |   | -3.979786                         | 5.173830     |
| H       | 2.202847  |   | -2.679272                         | 6.367712     |
| H       | -0.902930 |   | -0.258479                         | 6.765125     |
| H       | -0.813776 |   | -2.020543                         | 6.876760     |
| H       | 0.650873  |   | -1.069220                         | 6.566384     |
| H       | -3.943823 |   | -1.251387                         | 4.951341     |
| H       | -2.862654 |   | -0.872788                         | 6.299138     |
| H       | -3.445513 |   | 0.417054                          | 5.225532     |
| H       | -3.595539 |   | -0.432969                         | 1.360692     |
| H       | -4.149900 |   | -1.359147                         | 2.762872     |
| H       | -3.983280 |   | 0.397110                          | 2.873853     |
| Complex |           |   | 5CN,H <sup>+</sup> F <sup>-</sup> |              |
| Atom    | X         | Y | Z                                 |              |
| C       | 1.807212  |   | -1.550523                         | 4.398908     |
| C       | 2.916606  |   | -1.393918                         | 3.594707     |
| C       | 0.504284  |   | -1.362418                         | 3.866365     |
| C       | 2.758267  |   | -0.983056                         | 2.253369     |
| C       | 1.511741  |   | -0.709685                         | 1.693623     |
| C       | 0.341704  |   | -0.966813                         | 2.490550     |
| B       | 1.552581  |   | 0.018920                          | 0.283925     |
| C       | -0.987894 |   | -0.881518                         | 1.966158     |
| C       | -0.640113 |   | -1.568245                         | 4.684651     |
| C       | -1.912915 |   | -1.421019                         | 4.175988     |
| C       | -2.074642 |   | -1.103430                         | 2.814596     |
| B       | -1.314351 |   | -0.670000                         | 0.428561     |
| C       | 2.619135  |   | -0.557942                         | -0.750842    |
| C       | 1.066338  |   | 1.541846                          | 0.155069     |
| C       | -2.258692 |   | -1.905784                         | -0.142554    |
| C       | -2.068175 |   | 0.774587                          | 0.124536     |
| C       | 3.701722  |   | 0.250997                          | -1.197783    |
| C       | 2.574990  |   | -1.905165                         | -1.206089    |
| C       | 4.634295  |   | -0.255227                         | -2.112738    |
| C       | 3.941842  |   | 1.656394                          | -0.687291    |
| C       | 3.517865  |   | -2.367039                         | -2.137271    |
| C       | 1.545966  |   | -2.908860                         | -0.733145    |
| C       | 4.546514  |   | -1.555452                         | -2.622425    |
| C       | 5.529479  |   | -2.061876                         | -3.646665    |
| C       | 0.596901  |   | 2.038455                          | -1.099232    |
| C       | 1.102092  |   | 2.461221                          | 1.243076     |
| C       | 0.086221  |   | 3.338115                          | -1.203980    |
| C       | 0.691651  |   | 1.267621                          | -2.397535    |
| C       | 0.609705  |   | 3.766170                          | 1.085882     |
| C       | 1.723477  |   | 2.142685                          | 2.582095     |
| C       | 0.078945  |   | 4.225636                          | -0.122698    |
| C       | -0.415229 |   | 5.638504                          | -0.278974    |
| C       | -3.011981 |   | -1.734881                         | -1.311044    |



| Journal Name |           |                     |           | ARTICLE |
|--------------|-----------|---------------------|-----------|---------|
| C            | -3.988532 | -2.646620           | -1.755925 |         |
| C            | -4.115308 | -3.870645           | -1.051954 |         |
| S            | -2.383254 | -0.342774           | -2.280412 |         |
| C            | -3.252736 | -4.155148           | 0.023635  |         |
| C            | -2.342196 | -3.168806           | 0.480866  |         |
| C            | -2.657553 | 1.022383            | -1.127786 |         |
| C            | -2.147859 | 1.819766            | 1.071662  |         |
| C            | -3.279362 | 2.231161            | -1.489517 |         |
| C            | -2.734412 | 3.067236            | 0.739819  |         |
| C            | -3.311296 | 3.269365            | -0.528186 |         |
| C            | -3.364255 | -0.146392           | -3.767711 |         |
| F            | -0.124011 | -0.726144           | -0.435756 |         |
| C            | -1.447829 | -3.581486           | 1.523324  |         |
| N            | -0.734751 | -4.141928           | 2.257541  |         |
| C            | -3.316676 | -5.433472           | 0.651442  |         |
| N            | -3.377666 | -6.479561           | 1.159716  |         |
| C            | -5.097003 | -4.823918           | -1.450247 |         |
| N            | -5.897081 | -5.606857           | -1.771410 |         |
| C            | -4.911329 | -2.429045           | -2.820661 |         |
| N            | -5.718997 | -2.313849           | -3.652065 |         |
| C            | -1.654623 | 1.746608            | 2.417104  |         |
| N            | -1.375332 | 1.932782            | 3.534849  |         |
| C            | -2.774902 | 4.129004            | 1.690476  |         |
| N            | -2.826473 | 5.010655            | 2.449555  |         |
| C            | -3.922784 | 4.516507            | -0.841886 |         |
| N            | -4.423122 | 5.538244            | -1.092716 |         |
| C            | -3.864253 | 2.536096            | -2.752841 |         |
| N            | -4.353088 | 2.878855            | -3.753087 |         |
| H            | 1.909681  | -1.840040           | 5.447448  |         |
| H            | 3.917543  | -1.568613           | 3.994594  |         |
| H            | 3.651561  | -0.831161           | 1.642462  |         |
| H            | -0.487797 | -1.854645           | 5.728193  |         |
| H            | -2.786899 | -1.577421           | 4.810210  |         |
| H            | -3.090618 | -1.033985           | 2.413090  |         |
| H            | 5.464309  | 0.384973            | -2.427316 |         |
| H            | 3.250148  | 2.385272            | -1.134987 |         |
| H            | 3.814897  | 1.729548            | 0.401464  |         |
| H            | 4.965518  | 1.974363            | -0.930082 |         |
| H            | 3.455261  | -3.405553           | -2.477228 |         |
| H            | 0.622327  | -2.853259           | -1.328918 |         |
| H            | 1.941719  | -3.929558           | -0.832287 |         |
| H            | 1.264752  | -2.745054           | 0.314121  |         |
| H            | 6.532798  | -1.642622           | -3.482629 |         |
| H            | 5.601392  | -3.158512           | -3.625175 |         |
| H            | 5.219891  | -1.772741           | -4.664787 |         |
| H            | -0.296391 | 3.676624            | -2.171613 |         |
| H            | 0.604978  | 0.185667            | -2.282033 |         |
| H            | -0.069265 | 1.621113            | -3.109832 |         |
| H            | 1.671785  | 1.456001            | -2.866069 |         |
| H            | 0.645106  | 4.446098            | 1.941411  |         |
| H            | 1.785779  | 3.055039            | 3.190238  |         |
| H            | 1.142910  | 1.401896            | 3.147735  |         |
| H            | 2.737081  | 1.733099            | 2.472233  |         |
| H            | -1.212930 | 5.705867            | -1.032276 |         |
| H            | -0.789399 | 6.044146            | 0.670701  |         |
| H            | 0.401269  | 6.297215            | -0.617351 |         |
| H            | -4.417260 | 0.064250            | -3.577847 |         |
| H            | -2.869460 | 0.654877            | -4.327772 |         |
| H            | -3.219994 | -1.088043           | -4.312098 |         |
| Complex      |           | SH,CN <sup>-F</sup> |           |         |
| Atom         | X         | Y                   | Z         |         |
| C            | 1.665765  | -1.780940           | 4.408991  |         |

| ARTICLE |           |           | Journal Name |
|---------|-----------|-----------|--------------|
| C       | 2.793073  | -1.694392 | 3.588459     |
| C       | 0.403967  | -1.320080 | 3.923216     |
| C       | 2.701977  | -1.118275 | 2.285473     |
| C       | 1.476821  | -0.730766 | 1.731366     |
| C       | 0.292534  | -0.914915 | 2.541307     |
| B       | 1.461903  | -0.026685 | 0.264772     |
| C       | -1.004537 | -0.676455 | 1.982871     |
| C       | -0.742206 | -1.243316 | 4.772754     |
| C       | -1.989393 | -0.913748 | 4.231789     |
| C       | -2.116280 | -0.692592 | 2.833947     |
| B       | -1.307677 | -0.518579 | 0.417868     |
| C       | 2.537127  | -0.649922 | -0.761567    |
| C       | 1.168836  | 1.561622  | 0.204519     |
| C       | -2.139106 | -1.778005 | -0.159062    |
| C       | -1.990961 | 0.884991  | 0.029641     |
| C       | 3.604761  | 0.118288  | -1.304958    |
| C       | 2.441476  | -2.013273 | -1.159673    |
| C       | 4.466039  | -0.444478 | -2.253432    |
| C       | 3.936997  | 1.524713  | -0.855224    |
| C       | 3.327867  | -2.538870 | -2.112763    |
| C       | 1.415138  | -2.977551 | -0.604440    |
| C       | 4.335530  | -1.766821 | -2.693408    |
| C       | 5.255427  | -2.334925 | -3.742926    |
| C       | 0.734185  | 2.114445  | -1.038661    |
| C       | 1.280094  | 2.450202  | 1.304544     |
| C       | 0.348803  | 3.455903  | -1.119928    |
| C       | 0.714846  | 1.353112  | -2.347927    |
| C       | 0.893770  | 3.794239  | 1.175577     |
| C       | 1.854682  | 2.058317  | 2.648314     |
| C       | 0.400017  | 4.316413  | -0.019740    |
| C       | -0.069454 | 5.742372  | -0.127743    |
| C       | -2.742329 | -1.726377 | -1.425216    |
| C       | -3.422561 | -2.801874 | -2.004065    |
| C       | -3.535918 | -3.987944 | -1.276910    |
| S       | -2.464160 | -0.250507 | -2.420682    |
| C       | -2.952605 | -4.086660 | -0.011409    |
| C       | -2.266689 | -2.998044 | 0.528660     |
| C       | -2.594927 | 1.083108  | -1.220581    |
| C       | -2.050161 | 1.975679  | 0.914300     |
| C       | -3.180009 | 2.289005  | -1.618231    |
| C       | -2.649153 | 3.182935  | 0.563318     |
| C       | -3.211895 | 3.343544  | -0.705447    |
| C       | -3.968359 | -0.097582 | -3.408954    |
| F       | 0.029623  | -0.637846 | -0.333740    |
| C       | -3.441539 | -0.503609 | 2.326724     |
| N       | -4.543673 | -0.369304 | 1.972384     |
| C       | -3.136425 | -0.820499 | 5.073541     |
| N       | -4.083073 | -0.740086 | 5.747954     |
| C       | -0.688670 | -1.408379 | 6.188271     |
| N       | -0.742641 | -1.474615 | 7.350831     |
| C       | 1.841574  | -2.412702 | 5.675119     |
| N       | 2.073556  | -2.984212 | 6.664328     |
| C       | 4.046862  | -2.175435 | 4.070674     |
| N       | 5.067927  | -2.572153 | 4.467451     |
| C       | 3.967723  | -0.944561 | 1.635627     |
| N       | 5.086199  | -0.837608 | 1.321187     |
| H       | 5.287302  | 0.164723  | -2.643158    |
| H       | 3.299117  | 2.280354  | -1.336792    |
| H       | 3.815929  | 1.654891  | 0.226829     |
| H       | 4.980856  | 1.756313  | -1.110093    |
| H       | 3.231766  | -3.591167 | -2.397309    |
| H       | 0.457083  | -2.907003 | -1.140483    |

|   |           |           |           |
|---|-----------|-----------|-----------|
| H | 1.776495  | -4.010570 | -0.703520 |
| H | 1.194051  | -2.798777 | 0.455927  |
| H | 6.278855  | -1.947909 | -3.631891 |
| H | 5.289565  | -3.432369 | -3.694505 |
| H | 4.913571  | -2.059643 | -4.754497 |
| H | -0.010591 | 3.839833  | -2.079270 |
| H | 0.493518  | 0.288593  | -2.244937 |
| H | -0.020001 | 1.800337  | -3.032323 |
| H | 1.699215  | 1.419086  | -2.839503 |
| H | 0.980755  | 4.451180  | 2.045969  |
| H | 2.018032  | 2.955123  | 3.261009  |
| H | 1.188527  | 1.397408  | 3.221109  |
| H | 2.822567  | 1.546540  | 2.553375  |
| H | -1.163257 | 5.782058  | -0.259365 |
| H | 0.182611  | 6.317886  | 0.773471  |
| H | 0.375366  | 6.247498  | -0.998570 |
| H | -3.866503 | -2.738007 | -2.995758 |
| H | -4.077716 | -4.830393 | -1.708049 |
| H | -3.027558 | -5.017048 | 0.553379  |
| H | -1.810298 | -3.101523 | 1.514605  |
| H | -1.591828 | 1.880611  | 1.899052  |
| H | -3.612782 | 2.422772  | -2.607906 |
| H | -2.663002 | 4.008989  | 1.275348  |
| H | -3.675970 | 4.287233  | -0.993921 |
| H | -4.850873 | -0.099311 | -2.761284 |
| H | -3.875899 | 0.832685  | -3.979039 |
| H | -3.969363 | -0.934255 | -4.115192 |

| Complex Atom | X         | 5NO <sub>2</sub> H <sup>+</sup> F <sup>-</sup><br>Y | Z         |
|--------------|-----------|-----------------------------------------------------|-----------|
| C            | 2.018927  | -1.573732                                           | 4.337040  |
| C            | 3.087665  | -1.411993                                           | 3.481392  |
| C            | 0.689935  | -1.396551                                           | 3.870100  |
| C            | 2.856111  | -0.998107                                           | 2.153526  |
| C            | 1.580349  | -0.724242                                           | 1.657091  |
| C            | 0.445725  | -0.999224                                           | 2.504301  |
| B            | 1.604269  | 0.061307                                            | 0.284621  |
| C            | -0.919784 | -0.939411                                           | 2.057543  |
| C            | -0.399434 | -1.617087                                           | 4.758462  |
| C            | -1.698812 | -1.496512                                           | 4.322590  |
| C            | -1.941280 | -1.191460                                           | 2.967088  |
| B            | -1.346909 | -0.736720                                           | 0.542600  |
| C            | 2.635941  | -0.450788                                           | -0.812415 |
| C            | 1.046693  | 1.550499                                            | 0.188790  |
| C            | -2.306433 | -1.996447                                           | -0.043653 |
| C            | -2.196309 | 0.699815                                            | 0.227695  |
| C            | 3.687693  | 0.406581                                            | -1.247690 |
| C            | 2.594605  | -1.764647                                           | -1.353346 |
| C            | 4.596958  | -0.025968                                           | -2.220734 |
| C            | 3.915730  | 1.786146                                            | -0.666836 |
| C            | 3.511396  | -2.150567                                           | -2.343802 |
| C            | 1.585559  | -2.802463                                           | -0.921657 |
| C            | 4.512034  | -1.293939                                           | -2.807976 |
| C            | 5.468920  | -1.717786                                           | -3.892457 |
| C            | 0.534537  | 2.046486                                            | -1.045894 |
| C            | 1.083464  | 2.455037                                            | 1.288968  |
| C            | -0.025649 | 3.329073                                            | -1.120556 |
| C            | 0.643699  | 1.297254                                            | -2.354986 |
| C            | 0.548790  | 3.742092                                            | 1.161972  |
| C            | 1.764937  | 2.133463                                            | 2.597976  |
| C            | -0.032406 | 4.198413                                            | -0.026024 |
| C            | -0.569529 | 5.600090                                            | -0.136393 |
| C            | -2.972289 | -1.791956                                           | -1.269738 |

| ARTICLE |           |           | Journal Name |
|---------|-----------|-----------|--------------|
| C       | -3.942128 | -2.661698 | -1.770247    |
| C       | -4.182834 | -3.863696 | -1.106414    |
| S       | -2.208778 | -0.431791 | -2.190672    |
| C       | -3.445109 | -4.170761 | 0.030273     |
| C       | -2.533745 | -3.245482 | 0.550648     |
| C       | -2.668855 | 0.931668  | -1.089040    |
| C       | -2.520192 | 1.721064  | 1.135700     |
| C       | -3.336825 | 2.089623  | -1.485061    |
| C       | -3.169125 | 2.899985  | 0.762151     |
| C       | -3.559213 | 3.108061  | -0.556559    |
| C       | -2.878016 | -0.311992 | -3.854382    |
| F       | -0.225417 | -0.739346 | -0.380409    |
| N       | -2.300700 | 1.612887  | 2.617367     |
| O       | -3.332345 | 1.427185  | 3.268159     |
| O       | -1.179000 | 1.769782  | 3.061892     |
| N       | -3.565907 | 3.880203  | 1.818666     |
| O       | -4.771484 | 4.014213  | 1.999474     |
| O       | -2.658445 | 4.425516  | 2.436478     |
| N       | -4.201081 | 4.381437  | -0.951856    |
| O       | -5.018422 | 4.341017  | -1.869928    |
| O       | -3.860024 | 5.386442  | -0.331198    |
| N       | -3.812066 | 2.290579  | -2.884970    |
| O       | -4.864820 | 1.733615  | -3.177911    |
| O       | -3.097466 | 2.962127  | -3.621371    |
| N       | -1.744914 | -3.740125 | 1.721800     |
| O       | -2.383648 | -4.140116 | 2.695311     |
| O       | -0.531135 | -3.807976 | 1.567154     |
| N       | -3.651571 | -5.489721 | 0.695677     |
| O       | -2.694265 | -6.255829 | 0.681280     |
| O       | -4.754451 | -5.684352 | 1.193408     |
| N       | -5.205443 | -4.811366 | -1.619330    |
| O       | -4.863530 | -5.985397 | -1.723385    |
| O       | -6.303343 | -4.334732 | -1.894325    |
| N       | -4.763440 | -2.350443 | -2.970002    |
| O       | -5.513620 | -1.383235 | -2.863355    |
| O       | -4.618655 | -3.069601 | -3.953496    |
| H       | 2.172317  | -1.862707 | 5.379532     |
| H       | 4.108376  | -1.581913 | 3.829751     |
| H       | 3.715483  | -0.835472 | 1.498569     |
| H       | -0.179566 | -1.895128 | 5.791995     |
| H       | -2.534546 | -1.671768 | 5.001517     |
| H       | -2.980170 | -1.171789 | 2.624677     |
| H       | 5.405302  | 0.647286  | -2.522371    |
| H       | 3.191546  | 2.520539  | -1.049430    |
| H       | 3.825410  | 1.795701  | 0.428024     |
| H       | 4.923087  | 2.141268  | -0.925735    |
| H       | 3.449388  | -3.165075 | -2.749905    |
| H       | 0.655544  | -2.727720 | -1.506226    |
| H       | 1.991216  | -3.812476 | -1.076947    |
| H       | 1.305831  | -2.693841 | 0.131392     |
| H       | 6.479735  | -1.323122 | -3.713402    |
| H       | 5.529646  | -2.812620 | -3.967523    |
| H       | 5.142654  | -1.337468 | -4.874708    |
| H       | -0.436472 | 3.671446  | -2.075245    |
| H       | 0.578276  | 0.211467  | -2.255265    |
| H       | -0.118343 | 1.650804  | -3.065168    |
| H       | 1.620117  | 1.505801  | -2.822328    |
| H       | 0.590572  | 4.414851  | 2.022890     |
| H       | 1.783987  | 3.025200  | 3.239303     |
| H       | 1.259764  | 1.330726  | 3.148429     |
| H       | 2.802421  | 1.803254  | 2.442886     |
| H       | -1.145195 | 5.739203  | -1.060831    |

|         |                                                   |           |           |
|---------|---------------------------------------------------|-----------|-----------|
| H       | -1.214679                                         | 5.849844  | 0.717819  |
| H       | 0.255831                                          | 6.330542  | -0.141612 |
| H       | -3.951995                                         | -0.134034 | -3.916537 |
| H       | -2.293424                                         | 0.487522  | -4.326049 |
| H       | -2.575263                                         | -1.260661 | -4.317610 |
| Complex | <b>5H,NO<sub>2</sub><sup>+</sup>F<sup>-</sup></b> |           |           |
| Atom    | X                                                 | Y         | Z         |
| C       | 1.550854                                          | -1.158577 | 4.545311  |
| C       | 2.689807                                          | -1.083030 | 3.777110  |
| C       | 0.281504                                          | -1.263508 | 3.907580  |
| C       | 2.595749                                          | -0.957195 | 2.381012  |
| C       | 1.398998                                          | -0.700101 | 1.724052  |
| C       | 0.188352                                          | -0.941880 | 2.495181  |
| B       | 1.431825                                          | -0.059475 | 0.220209  |
| C       | -1.107920                                         | -0.899155 | 1.867553  |
| C       | -0.885815                                         | -1.680217 | 4.601231  |
| C       | -2.113912                                         | -1.658531 | 3.978608  |
| C       | -2.209159                                         | -1.230112 | 2.648603  |
| B       | -1.364710                                         | -0.555517 | 0.307663  |
| C       | 2.549039                                          | -0.713783 | -0.757558 |
| C       | 1.205977                                          | 1.544428  | 0.110768  |
| C       | -2.127835                                         | -1.722599 | -0.489202 |
| C       | -1.946994                                         | 0.924936  | 0.107783  |
| C       | 3.634217                                          | 0.026009  | -1.310527 |
| C       | 2.464555                                          | -2.094096 | -1.100550 |
| C       | 4.530383                                          | -0.591824 | -2.196302 |
| C       | 3.935683                                          | 1.474245  | -0.993733 |
| C       | 3.373522                                          | -2.666901 | -1.998611 |
| C       | 1.428069                                          | -3.028953 | -0.525185 |
| C       | 4.411353                                          | -1.930085 | -2.575920 |
| C       | 5.363276                                          | -2.555830 | -3.561556 |
| C       | 0.781954                                          | 2.054300  | -1.154742 |
| C       | 1.405696                                          | 2.486691  | 1.153217  |
| C       | 0.543585                                          | 3.422671  | -1.324946 |
| C       | 0.558114                                          | 1.197996  | -2.381808 |
| C       | 1.168129                                          | 3.851732  | 0.932466  |
| C       | 1.880110                                          | 2.127245  | 2.543027  |
| C       | 0.720180                                          | 4.345794  | -0.293119 |
| C       | 0.401595                                          | 5.803736  | -0.487171 |
| C       | -2.869489                                         | -1.495206 | -1.654721 |
| C       | -3.357535                                         | -2.518575 | -2.478724 |
| C       | -3.145612                                         | -3.842712 | -2.100028 |
| S       | -3.320461                                         | 0.144977  | -2.213022 |
| C       | -2.446200                                         | -4.120132 | -0.921150 |
| C       | -1.941398                                         | -3.076481 | -0.146782 |
| C       | -2.705183                                         | 1.309458  | -1.003962 |
| C       | -1.698267                                         | 1.945522  | 1.045445  |
| C       | -3.116559                                         | 2.628178  | -1.249845 |
| C       | -2.131962                                         | 3.254528  | 0.860419  |
| C       | -2.825140                                         | 3.605766  | -0.303666 |
| C       | -5.093450                                         | 0.140422  | -1.781287 |
| H       | 5.360934                                          | -0.000869 | -2.593811 |
| H       | 3.302409                                          | 2.159147  | -1.577390 |
| H       | 3.770910                                          | 1.721010  | 0.060372  |
| H       | 4.983995                                          | 1.693706  | -1.240700 |
| H       | 3.278574                                          | -3.730878 | -2.236027 |
| H       | 0.481123                                          | -2.974049 | -1.080032 |
| H       | 1.782744                                          | -4.067507 | -0.575771 |
| H       | 1.194744                                          | -2.806092 | 0.524256  |
| H       | 6.331748                                          | -2.036175 | -3.569231 |
| H       | 5.536640                                          | -3.617411 | -3.333471 |
| H       | 4.955645                                          | -2.505835 | -4.584959 |

| ARTICLE |                                       |           |           | Journal Name |
|---------|---------------------------------------|-----------|-----------|--------------|
| H       | 0.207858                              | 3.776217  | -2.304351 |              |
| H       | -0.464706                             | 0.791601  | -2.401585 |              |
| H       | 0.680069                              | 1.805302  | -3.289115 |              |
| H       | 1.240602                              | 0.343088  | -2.436313 |              |
| H       | 1.327507                              | 4.550761  | 1.758587  |              |
| H       | 1.972823                              | 3.034971  | 3.153742  |              |
| H       | 1.178009                              | 1.461866  | 3.067775  |              |
| H       | 2.862907                              | 1.636278  | 2.532892  |              |
| H       | -0.685161                             | 5.975190  | -0.408012 |              |
| H       | 0.891341                              | 6.428162  | 0.272888  |              |
| H       | 0.710817                              | 6.155216  | -1.482392 |              |
| H       | -3.897866                             | -2.289509 | -3.399009 |              |
| H       | -3.525504                             | -4.650709 | -2.725882 |              |
| H       | -2.280470                             | -5.153925 | -0.614917 |              |
| H       | -1.375104                             | -3.316237 | 0.755278  |              |
| H       | -1.140936                             | 1.699603  | 1.949205  |              |
| H       | -3.664261                             | 2.885720  | -2.158195 |              |
| H       | -1.912363                             | 4.010582  | 1.614586  |              |
| H       | -3.142905                             | 4.634725  | -0.474730 |              |
| H       | -5.187379                             | -0.100931 | -0.716850 |              |
| H       | -5.479786                             | 1.139465  | -2.010371 |              |
| H       | -5.573686                             | -0.610394 | -2.418300 |              |
| F       | 0.031205                              | -0.634054 | -0.387235 |              |
| N       | 3.924207                              | -0.977634 | 1.690781  |              |
| O       | 4.311234                              | -2.071081 | 1.293464  |              |
| O       | 4.574593                              | 0.070287  | 1.689196  |              |
| N       | 4.034477                              | -0.965828 | 4.411664  |              |
| O       | 4.777311                              | -1.936155 | 4.302195  |              |
| O       | 4.296054                              | 0.109006  | 4.943351  |              |
| N       | 1.686039                              | -1.019130 | 6.006008  |              |
| O       | 2.629898                              | -1.584832 | 6.558237  |              |
| O       | 0.852432                              | -0.301956 | 6.568190  |              |
| N       | -0.824418                             | -2.268009 | 5.958307  |              |
| O       | 0.045765                              | -3.120752 | 6.149637  |              |
| O       | -1.658528                             | -1.894688 | 6.781086  |              |
| N       | -3.335375                             | -2.140124 | 4.678878  |              |
| O       | -3.370754                             | -3.325456 | 4.991075  |              |
| O       | -4.215527                             | -1.301999 | 4.859291  |              |
| N       | -3.575683                             | -1.288236 | 2.049426  |              |
| O       | -4.128691                             | -2.389351 | 2.052119  |              |
| O       | -4.050689                             | -0.246819 | 1.605566  |              |
| Complex | <b>5OH,H<sup>-</sup>F<sup>-</sup></b> |           |           |              |
| Atom    | X                                     | Y         | Z         |              |
| C       | 1.614044                              | -1.436738 | 4.470923  |              |
| C       | 2.707348                              | -1.222196 | 3.658210  |              |
| C       | 0.299183                              | -1.311995 | 3.947094  |              |
| C       | 2.518057                              | -0.819895 | 2.318045  |              |
| C       | 1.259868                              | -0.615709 | 1.759785  |              |
| C       | 0.108939                              | -0.930664 | 2.565545  |              |
| B       | 1.191782                              | 0.017897  | 0.280561  |              |
| C       | -1.231780                             | -0.891201 | 2.045234  |              |
| C       | -0.827096                             | -1.566581 | 4.776377  |              |
| C       | -2.106784                             | -1.485811 | 4.269066  |              |
| C       | -2.294543                             | -1.169751 | 2.904819  |              |
| B       | -1.597042                             | -0.594269 | 0.514344  |              |
| C       | 2.352189                              | -0.629088 | -0.667293 |              |
| C       | 0.942533                              | 1.619208  | 0.094679  |              |
| C       | -2.299913                             | -1.820074 | -0.277617 |              |
| C       | -2.247451                             | 0.857877  | 0.236831  |              |
| C       | 3.538697                              | 0.084580  | -0.995459 |              |
| C       | 2.266468                              | -1.972697 | -1.129663 |              |
| C       | 4.524427                              | -0.497626 | -1.809261 |              |

| Journal Name |           |           | ARTICLE   |
|--------------|-----------|-----------|-----------|
| C            | 3.841913  | 1.476370  | -0.479677 |
| C            | 3.266475  | -2.515911 | -1.951587 |
| C            | 1.132943  | -2.897642 | -0.749576 |
| C            | 4.400133  | -1.789821 | -2.326293 |
| C            | 5.446033  | -2.377243 | -3.240434 |
| C            | 0.568674  | 2.096731  | -1.193718 |
| C            | 1.094342  | 2.593550  | 1.119291  |
| C            | 0.348099  | 3.464791  | -1.420339 |
| C            | 0.401697  | 1.192616  | -2.394682 |
| C            | 0.869952  | 3.951941  | 0.852375  |
| C            | 1.534929  | 2.263846  | 2.527997  |
| C            | 0.495358  | 4.416745  | -0.411365 |
| C            | 0.284791  | 5.887804  | -0.671492 |
| C            | -2.889188 | -1.635358 | -1.544097 |
| C            | -3.226799 | -2.683682 | -2.412898 |
| C            | -2.993451 | -4.009325 | -2.026422 |
| S            | -3.279422 | -0.046316 | -2.233803 |
| C            | -2.472407 | -4.248948 | -0.752031 |
| C            | -2.129448 | -3.170107 | 0.088772  |
| C            | -2.804114 | 1.164010  | -1.025825 |
| C            | -2.134042 | 1.940275  | 1.125615  |
| C            | -3.096564 | 2.467572  | -1.452617 |
| C            | -2.495224 | 3.249280  | 0.743403  |
| C            | -2.914091 | 3.519345  | -0.553685 |
| C            | -5.095135 | 0.003358  | -2.016580 |
| H            | 1.737497  | -1.723616 | 5.518413  |
| H            | 3.719228  | -1.346453 | 4.051315  |
| H            | 3.400225  | -0.629623 | 1.701497  |
| H            | -0.656019 | -1.841229 | 5.820493  |
| H            | -2.970321 | -1.686540 | 4.906532  |
| H            | -3.313275 | -1.148933 | 2.504916  |
| H            | 5.426690  | 0.080203  | -2.035103 |
| H            | 3.261530  | 2.248223  | -1.005924 |
| H            | 3.604132  | 1.583093  | 0.586942  |
| H            | 4.909988  | 1.700892  | -0.615409 |
| H            | 3.161772  | -3.551918 | -2.290823 |
| H            | 0.225360  | -2.703961 | -1.339150 |
| H            | 1.424046  | -3.944760 | -0.916569 |
| H            | 0.849732  | -2.780153 | 0.304492  |
| H            | 6.439709  | -1.950631 | -3.040375 |
| H            | 5.508470  | -3.469699 | -3.129550 |
| H            | 5.209997  | -2.170962 | -4.297927 |
| H            | 0.062114  | 3.792351  | -2.425366 |
| H            | -0.564393 | 0.667703  | -2.371241 |
| H            | 0.436785  | 1.779908  | -3.323113 |
| H            | 1.176341  | 0.416240  | -2.435606 |
| H            | 0.995285  | 4.673118  | 1.666210  |
| H            | 1.537564  | 3.175420  | 3.143073  |
| H            | 0.877880  | 1.525525  | 3.003366  |
| H            | 2.549232  | 1.837532  | 2.552717  |
| H            | -0.402946 | 6.337486  | 0.062264  |
| H            | 1.230461  | 6.448510  | -0.594602 |
| H            | -0.114556 | 6.064403  | -1.681465 |
| H            | -5.318002 | -0.220811 | -0.968603 |
| H            | -5.410142 | 1.013963  | -2.298786 |
| H            | -5.528008 | -0.736246 | -2.697095 |
| F            | -0.216830 | -0.567862 | -0.300550 |
| O            | -2.368131 | 4.233872  | 1.680154  |
| H            | -2.641557 | 5.080693  | 1.271758  |
| O            | -1.652954 | 1.781897  | 2.397394  |
| H            | -1.488798 | 2.677602  | 2.756071  |
| O            | -3.238452 | 4.819556  | -0.930100 |

## ARTICLE

## Journal Name

|         |           |                                   |           |
|---------|-----------|-----------------------------------|-----------|
| H       | -2.450215 | 5.245266                          | -1.324399 |
| O       | -3.574497 | 2.696691                          | -2.714201 |
| H       | -3.815867 | 3.645350                          | -2.767609 |
| O       | -3.713751 | -2.416161                         | -3.687966 |
| H       | -4.620052 | -2.770086                         | -3.783200 |
| O       | -3.262882 | -5.066339                         | -2.848481 |
| H       | -3.416832 | -4.714505                         | -3.748628 |
| O       | -2.243917 | -5.531830                         | -0.350938 |
| H       | -1.860207 | -5.467426                         | 0.550652  |
| O       | -1.560461 | -3.598100                         | 1.259991  |
| H       | -1.453352 | -2.810697                         | 1.854870  |
| Complex |           | 5H,OH <sup>-</sup> F <sup>-</sup> |           |
| Atom    | X         | Y                                 | Z         |
| C       | 1.839555  | -1.631904                         | 4.499247  |
| C       | 2.922563  | -1.627069                         | 3.639786  |
| C       | 0.550199  | -1.263162                         | 4.001885  |
| C       | 2.766317  | -1.192872                         | 2.300516  |
| C       | 1.553869  | -0.776251                         | 1.761380  |
| C       | 0.394616  | -0.880849                         | 2.610934  |
| B       | 1.509285  | -0.045624                         | 0.332543  |
| C       | -0.916351 | -0.589504                         | 2.100334  |
| C       | -0.594764 | -1.245427                         | 4.843536  |
| C       | -1.831993 | -0.875593                         | 4.360866  |
| C       | -1.980808 | -0.572735                         | 2.992625  |
| B       | -1.265915 | -0.504127                         | 0.544485  |
| C       | 2.572586  | -0.603682                         | -0.766129 |
| C       | 1.180012  | 1.541798                          | 0.266839  |
| C       | -2.126759 | -1.777878                         | 0.015088  |
| C       | -1.984074 | 0.866771                          | 0.064214  |
| C       | 3.671317  | 0.183826                          | -1.221681 |
| C       | 2.442766  | -1.914366                         | -1.316059 |
| C       | 4.518526  | -0.292049                         | -2.233471 |
| C       | 4.020377  | 1.530729                          | -0.623759 |
| C       | 3.302242  | -2.345009                         | -2.336313 |
| C       | 1.413857  | -2.911362                         | -0.827724 |
| C       | 4.334503  | -1.541859                         | -2.831576 |
| C       | 5.223345  | -2.012739                         | -3.953878 |
| C       | 0.761959  | 2.112093                          | -0.973605 |
| C       | 1.260333  | 2.420575                          | 1.378964  |
| C       | 0.362789  | 3.450597                          | -1.050515 |
| C       | 0.775381  | 1.363131                          | -2.290570 |
| C       | 0.859081  | 3.762341                          | 1.258285  |
| C       | 1.806641  | 2.020089                          | 2.732571  |
| C       | 0.381358  | 4.296719                          | 0.061493  |
| C       | -0.102910 | 5.719593                          | -0.035755 |
| C       | -2.665965 | -1.806296                         | -1.279859 |
| C       | -3.357361 | -2.895802                         | -1.818426 |
| C       | -3.553171 | -4.017582                         | -1.010316 |
| S       | -2.290925 | -0.395028                         | -2.339197 |
| C       | -3.048581 | -4.032765                         | 0.293735  |
| C       | -2.350498 | -2.929549                         | 0.788977  |
| C       | -2.529340 | 0.999475                          | -1.223148 |
| C       | -2.115365 | 1.991445                          | 0.897905  |
| C       | -3.120790 | 2.169376                          | -1.703680 |
| C       | -2.727984 | 3.167750                          | 0.464413  |
| C       | -3.226460 | 3.260188                          | -0.836970 |
| C       | -3.698854 | -0.299579                         | -3.464314 |
| F       | 0.026889  | -0.641924                         | -0.284500 |
| O       | 3.975136  | -1.171544                         | 1.629871  |
| O       | 4.166983  | -2.007292                         | 4.093750  |
| O       | 2.072268  | -2.011925                         | 5.799782  |
| O       | -0.472789 | -1.586054                         | 6.184570  |



|         |           |                                        |           |
|---------|-----------|----------------------------------------|-----------|
| O       | -2.899413 | -0.861257                              | 5.235511  |
| O       | -3.300510 | -0.331097                              | 2.638415  |
| H       | 5.357011  | 0.333704                               | -2.554413 |
| H       | 3.398634  | 2.336316                               | -1.041760 |
| H       | 3.870974  | 1.554544                               | 0.463304  |
| H       | 5.072606  | 1.770998                               | -0.833174 |
| H       | 3.174355  | -3.354524                              | -2.739752 |
| H       | 0.448426  | -2.784547                              | -1.340212 |
| H       | 1.762753  | -3.935917                              | -1.020863 |
| H       | 1.217945  | -2.797080                              | 0.246033  |
| H       | 6.218536  | -1.549075                              | -3.899450 |
| H       | 5.345022  | -3.105371                              | -3.938278 |
| H       | 4.791587  | -1.747128                              | -4.933186 |
| H       | 0.018272  | 3.842478                               | -2.012701 |
| H       | 0.560761  | 0.296482                               | -2.193569 |
| H       | 0.047021  | 1.806529                               | -2.985347 |
| H       | 1.767861  | 1.441180                               | -2.764731 |
| H       | 0.920987  | 4.409267                               | 2.139314  |
| H       | 2.000086  | 2.918945                               | 3.335785  |
| H       | 1.107273  | 1.380648                               | 3.290325  |
| H       | 2.744298  | 1.454048                               | 2.650929  |
| H       | -1.190782 | 5.750980                               | -0.212283 |
| H       | 0.104326  | 6.278131                               | 0.887740  |
| H       | 0.371554  | 6.251645                               | -0.874837 |
| H       | -3.746156 | -2.890914                              | -2.835500 |
| H       | -4.101091 | -4.873779                              | -1.405890 |
| H       | -3.196968 | -4.912088                              | 0.923228  |
| H       | -1.954967 | -2.948566                              | 1.806699  |
| H       | -1.686213 | 1.938327                               | 1.900279  |
| H       | -3.503649 | 2.251182                               | -2.719588 |
| H       | -2.797397 | 4.024344                               | 1.136424  |
| H       | -3.696161 | 4.179404                               | -1.189067 |
| H       | -4.637200 | -0.263230                              | -2.901706 |
| H       | -3.551899 | 0.595651                               | -4.077761 |
| H       | -3.643667 | -1.176766                              | -4.117509 |
| H       | 3.781412  | -1.014096                              | 0.669625  |
| H       | 4.762651  | -1.909951                              | 3.320863  |
| H       | 1.210101  | -1.974966                              | 6.275153  |
| H       | -1.360364 | -1.558347                              | 6.593418  |
| H       | -3.686357 | -0.595027                              | 4.718710  |
| H       | -3.319623 | 0.112262                               | 1.764838  |
| Complex |           | <b>6CH<sub>3</sub>...F<sup>-</sup></b> |           |
| Atom    | X         | Y                                      | Z         |
| C       | -0.040189 | -2.049987                              | 4.142840  |
| C       | -1.389839 | -1.662206                              | 3.997855  |
| C       | 0.894966  | -1.709749                              | 3.143594  |
| C       | -1.811685 | -0.924705                              | 2.871813  |
| C       | 0.437930  | -0.931536                              | 2.063614  |
| C       | -0.898905 | -0.567662                              | 1.850612  |
| Sb      | 1.901007  | -0.239388                              | 0.653490  |
| B       | -1.353068 | 0.025061                               | 0.389059  |
| C       | 1.886922  | 1.591110                               | -0.435720 |
| C       | 2.061209  | 1.542863                               | -1.822537 |
| C       | 1.893656  | 2.813940                               | 0.242615  |
| C       | 2.224829  | 2.733838                               | -2.537392 |
| C       | 2.055215  | 3.998333                               | -0.479107 |
| C       | 2.221481  | 3.960045                               | -1.867048 |
| C       | 2.652730  | -1.698663                              | -0.708889 |
| C       | 1.868193  | -2.176956                              | -1.768041 |
| C       | 3.966155  | -2.158262                              | -0.542289 |
| C       | 2.401567  | -3.118981                              | -2.653089 |
| C       | 4.490970  | -3.104367                              | -1.428996 |

| ARTICLE |           |           | Journal Name |
|---------|-----------|-----------|--------------|
| C       | 3.709128  | -3.585520 | -2.483435    |
| C       | -2.681303 | -0.790492 | -0.154786    |
| C       | -3.933749 | -0.186198 | -0.460625    |
| C       | -2.610248 | -2.208172 | -0.311769    |
| C       | -5.007622 | -0.952560 | -0.945817    |
| C       | -3.700944 | -2.935941 | -0.813820    |
| C       | -4.912880 | -2.329376 | -1.153961    |
| C       | -1.306910 | 1.646100  | 0.177186     |
| C       | -1.312801 | 2.141883  | -1.161269    |
| C       | -1.228268 | 2.615086  | 1.211688     |
| C       | -1.263649 | 3.514852  | -1.424435    |
| C       | -1.189755 | 3.987817  | 0.907238     |
| C       | -1.203747 | 4.465567  | -0.402512    |
| C       | 3.649511  | 0.289457  | 1.812136     |
| C       | -4.234235 | 1.287294  | -0.273486    |
| C       | -6.061133 | -3.124563 | -1.723078    |
| C       | -1.104166 | 5.936446  | -0.711470    |
| C       | -1.157783 | 2.278135  | 2.686624     |
| C       | -1.374045 | 1.235162  | -2.369649    |
| F       | -0.198231 | -0.460278 | -0.536356    |
| C       | 2.294399  | -2.275246 | 3.216559     |
| C       | 0.404403  | -2.826098 | 5.362670     |
| C       | -2.401209 | -2.075504 | 5.042522     |
| C       | -3.259554 | -0.499900 | 2.794389     |
| C       | -1.407025 | -3.035517 | 0.095441     |
| H       | 2.076281  | 0.587618  | -2.349846    |
| H       | 1.757703  | 2.857515  | 1.323719     |
| H       | 2.354462  | 2.699218  | -3.620716    |
| H       | 2.041861  | 4.954466  | 0.046247     |
| H       | 2.344592  | 4.888800  | -2.426855    |
| H       | 0.850268  | -1.813698 | -1.903399    |
| H       | 4.592096  | -1.785783 | 0.269960     |
| H       | 1.790179  | -3.488428 | -3.478346    |
| H       | 5.513022  | -3.462374 | -1.293985    |
| H       | 4.120054  | -4.323031 | -3.174939    |
| H       | -5.955311 | -0.447898 | -1.161515    |
| H       | -3.600986 | -4.020832 | -0.925285    |
| H       | -1.269687 | 3.852186  | -2.466075    |
| H       | -1.126123 | 4.706539  | 1.730779     |
| H       | 4.280201  | 0.911288  | 1.166189     |
| H       | 3.307063  | 0.876838  | 2.673348     |
| H       | 4.205047  | -0.583370 | 2.165690     |
| H       | -5.322095 | 1.440713  | -0.220408    |
| H       | -3.778012 | 1.706989  | 0.631435     |
| H       | -3.850632 | 1.892732  | -1.108397    |
| H       | -7.027796 | -2.651914 | -1.496005    |
| H       | -5.985980 | -3.202238 | -2.820806    |
| H       | -6.075105 | -4.150534 | -1.326630    |
| H       | -1.263732 | 6.548000  | 0.187897     |
| H       | -0.106692 | 6.184626  | -1.112053    |
| H       | -1.838812 | 6.241814  | -1.472329    |
| H       | -0.286257 | 1.653826  | 2.927630     |
| H       | -1.086388 | 3.202785  | 3.277332     |
| H       | -2.039603 | 1.726198  | 3.037264     |
| H       | -1.730664 | 1.793473  | -3.247657    |
| H       | -0.376523 | 0.836442  | -2.606448    |
| H       | -2.028697 | 0.369564  | -2.207006    |
| H       | 2.272571  | -3.304787 | 3.597766     |
| H       | 2.764104  | -2.332129 | 2.225693     |
| H       | 2.959185  | -1.697213 | 3.877229     |
| H       | -0.129602 | -2.489782 | 6.261218     |
| H       | 0.212355  | -3.907919 | 5.257729     |

|         |           |                      |           |
|---------|-----------|----------------------|-----------|
| H       | 1.476447  | -2.701378            | 5.555546  |
| H       | -3.395219 | -2.222344            | 4.602281  |
| H       | -2.115836 | -3.011609            | 5.537889  |
| H       | -2.507113 | -1.308791            | 5.829723  |
| H       | -3.406395 | 0.274867             | 2.039034  |
| H       | -3.924238 | -1.339008            | 2.530745  |
| H       | -3.603884 | -0.102088            | 3.761350  |
| H       | -0.469330 | -2.648828            | -0.315740 |
| H       | -1.285620 | -3.041873            | 1.189466  |
| H       | -1.533063 | -4.075932            | -0.236879 |
| Complex |           | GCN...F <sup>-</sup> |           |
| Atom    | X         | Y                    | Z         |
| C       | 0.015469  | -1.850912            | 4.198309  |
| C       | -1.330225 | -1.473916            | 4.029908  |
| C       | 0.951332  | -1.514730            | 3.188875  |
| C       | -1.737469 | -0.827507            | 2.838422  |
| C       | 0.531716  | -0.808570            | 2.046662  |
| C       | -0.820042 | -0.498829            | 1.809859  |
| Sb      | 2.014641  | -0.291681            | 0.543901  |
| B       | -1.286266 | 0.023436             | 0.324357  |
| C       | 1.978081  | 1.487714             | -0.606406 |
| C       | 2.144407  | 1.387844             | -1.991074 |
| C       | 1.982971  | 2.727261             | 0.040083  |
| C       | 2.297575  | 2.557784             | -2.741746 |
| C       | 2.136310  | 3.886860             | -0.721625 |
| C       | 2.293179  | 3.803211             | -2.108713 |
| C       | 2.530984  | -1.972646            | -0.638341 |
| C       | 1.832768  | -2.273000            | -1.815689 |
| C       | 3.609444  | -2.763149            | -0.221477 |
| C       | 2.226922  | -3.374169            | -2.580414 |
| C       | 3.987054  | -3.869142            | -0.989383 |
| C       | 3.298691  | -4.172419            | -2.167527 |
| C       | -2.648689 | -0.781397            | -0.102946 |
| C       | -3.909912 | -0.152427            | -0.305273 |
| C       | -2.600440 | -2.197771            | -0.267266 |
| C       | -5.027575 | -0.907481            | -0.688781 |
| C       | -3.746713 | -2.916537            | -0.643079 |
| C       | -4.972992 | -2.291970            | -0.875162 |
| C       | -1.224152 | 1.628299             | 0.056429  |
| C       | -1.229547 | 2.051399             | -1.304801 |
| C       | -1.162262 | 2.639514             | 1.046364  |
| C       | -1.167696 | 3.410553             | -1.629869 |
| C       | -1.104010 | 3.994502             | 0.679763  |
| C       | -1.098994 | 4.407036             | -0.652754 |
| C       | 3.788215  | 0.176103             | 1.668467  |
| C       | -4.161785 | 1.324227             | -0.093918 |
| C       | -6.185448 | -3.073247            | -1.312221 |
| C       | -0.987571 | 5.860263             | -1.031071 |
| C       | -1.176754 | 2.359922             | 2.532508  |
| C       | -1.319311 | 1.085008             | -2.463056 |
| F       | -0.153364 | -0.541490            | -0.539029 |
| C       | 2.281162  | -2.006744            | 3.356729  |
| N       | 3.340470  | -2.469749            | 3.503589  |
| C       | 0.423121  | -2.571312            | 5.356316  |
| N       | 0.759476  | -3.159526            | 6.304545  |
| C       | -2.274406 | -1.779962            | 5.054199  |
| N       | -3.039513 | -2.031457            | 5.895854  |
| C       | -3.129763 | -0.504526            | 2.759910  |
| N       | -4.259482 | -0.238260            | 2.872398  |
| C       | -1.346408 | -3.022516            | -0.074433 |
| H       | 2.166107  | 0.418130             | -2.489568 |
| H       | 1.852369  | 2.803162             | 1.119539  |

| ARTICLE |                                        |           |           | Journal Name |
|---------|----------------------------------------|-----------|-----------|--------------|
| H       | 2.421539                               | 2.489516  | -3.823653 |              |
| H       | 2.124225                               | 4.858717  | -0.226814 |              |
| H       | 2.409387                               | 4.713839  | -2.698394 |              |
| H       | 0.985090                               | -1.666266 | -2.129946 |              |
| H       | 4.156209                               | -2.536522 | 0.694274  |              |
| H       | 1.688723                               | -3.608966 | -3.499983 |              |
| H       | 4.821374                               | -4.491472 | -0.662646 |              |
| H       | 3.597498                               | -5.034502 | -2.765878 |              |
| H       | -5.983753                              | -0.392762 | -0.825303 |              |
| H       | -3.673530                              | -4.003124 | -0.751679 |              |
| H       | -1.173629                              | 3.698752  | -2.685613 |              |
| H       | -1.053953                              | 4.751043  | 1.468815  |              |
| H       | 4.411164                               | 0.753988  | 0.975584  |              |
| H       | 3.506868                               | 0.796725  | 2.527279  |              |
| H       | 4.312514                               | -0.719423 | 2.008566  |              |
| H       | -5.243734                              | 1.511057  | -0.040613 |              |
| H       | -3.703897                              | 1.697931  | 0.829094  |              |
| H       | -3.752317                              | 1.933641  | -0.912666 |              |
| H       | -7.108090                              | -2.655842 | -0.883256 |              |
| H       | -6.297148                              | -3.046326 | -2.408990 |              |
| H       | -6.109647                              | -4.129195 | -1.016336 |              |
| H       | -1.141513                              | 6.514866  | -0.161935 |              |
| H       | 0.011055                               | 6.080509  | -1.444127 |              |
| H       | -1.720492                              | 6.133163  | -1.805432 |              |
| H       | -0.325771                              | 1.744855  | 2.857747  |              |
| H       | -1.130963                              | 3.302411  | 3.095108  |              |
| H       | -2.093975                              | 1.840688  | 2.848515  |              |
| H       | -1.672171                              | 1.604456  | -3.365186 |              |
| H       | -0.334415                              | 0.651221  | -2.691281 |              |
| H       | -1.994357                              | 0.245734  | -2.250470 |              |
| H       | -0.780273                              | -2.741348 | 0.822127  |              |
| H       | -1.603548                              | -4.087242 | 0.012187  |              |
| H       | -0.654749                              | -2.910138 | -0.920539 |              |
| Complex | <b>6NO<sub>2</sub>···F<sup>-</sup></b> |           |           |              |
| Atom    | X                                      | Y         | Z         |              |
| C       | -0.175088                              | -1.806997 | 4.258214  |              |
| C       | -1.508826                              | -1.500063 | 4.013097  |              |
| C       | 0.771800                               | -1.479642 | 3.285551  |              |
| C       | -1.870262                              | -0.887740 | 2.813340  |              |
| C       | 0.411204                               | -0.829421 | 2.106446  |              |
| C       | -0.939991                              | -0.527037 | 1.825230  |              |
| Sb      | 1.947450                               | -0.307358 | 0.632303  |              |
| B       | -1.337094                              | 0.008858  | 0.317528  |              |
| C       | 1.957904                               | 1.483059  | -0.508090 |              |
| C       | 2.125221                               | 1.371190  | -1.892326 |              |
| C       | 2.015924                               | 2.724536  | 0.131591  |              |
| C       | 2.331412                               | 2.529143  | -2.648107 |              |
| C       | 2.220372                               | 3.873186  | -0.635277 |              |
| C       | 2.377735                               | 3.776996  | -2.021248 |              |
| C       | 2.557752                               | -1.906293 | -0.620059 |              |
| C       | 1.828449                               | -2.254731 | -1.764254 |              |
| C       | 3.763368                               | -2.549355 | -0.313663 |              |
| C       | 2.312663                               | -3.264416 | -2.600806 |              |
| C       | 4.234608                               | -3.561264 | -1.155607 |              |
| C       | 3.510316                               | -3.918816 | -2.296576 |              |
| C       | -2.679256                              | -0.785001 | -0.178740 |              |
| C       | -3.930531                              | -0.150645 | -0.430084 |              |
| C       | -2.633434                              | -2.204177 | -0.330433 |              |
| C       | -5.047770                              | -0.908520 | -0.812173 |              |
| C       | -3.773956                              | -2.920456 | -0.719980 |              |
| C       | -4.997095                              | -2.295183 | -0.972130 |              |
| C       | -1.220415                              | 1.614980  | 0.081674  |              |

| Journal Name |           |                                 |           | ARTICLE |
|--------------|-----------|---------------------------------|-----------|---------|
| C            | -1.217052 | 2.054594                        | -1.275478 |         |
| C            | -1.095537 | 2.611289                        | 1.083494  |         |
| C            | -1.126365 | 3.414782                        | -1.586862 |         |
| C            | -1.018439 | 3.968900                        | 0.727584  |         |
| C            | -1.032596 | 4.398173                        | -0.599060 |         |
| C            | 3.679585  | 0.179893                        | 1.814471  |         |
| C            | -1.391703 | -3.038184                       | -0.097443 |         |
| C            | -4.167291 | 1.337624                        | -0.307447 |         |
| C            | -6.206002 | -3.080699                       | -1.409840 |         |
| C            | -0.898469 | 5.853352                        | -0.961221 |         |
| C            | -1.008176 | 2.324916                        | 2.567376  |         |
| C            | -1.305816 | 1.102453                        | -2.445273 |         |
| H            | 2.108503  | 0.398944                        | -2.385960 |         |
| H            | 1.890594  | 2.813063                        | 1.210576  |         |
| H            | 2.456687  | 2.449812                        | -3.729119 |         |
| H            | 2.248901  | 4.846884                        | -0.144575 |         |
| H            | 2.535077  | 4.679148                        | -2.614396 |         |
| H            | 0.893706  | -1.750776                       | -2.002072 |         |
| H            | 4.339326  | -2.279242                       | 0.571432  |         |
| H            | 1.747307  | -3.537851                       | -3.493003 |         |
| H            | 5.170347  | -4.068162                       | -0.915521 |         |
| H            | 3.881320  | -4.708633                       | -2.951576 |         |
| H            | -5.996806 | -0.390447                       | -0.981145 |         |
| H            | -3.704186 | -4.008513                       | -0.814002 |         |
| H            | -1.128018 | 3.714054                        | -2.639466 |         |
| H            | -0.924084 | 4.714470                        | 1.522865  |         |
| H            | 4.373674  | 0.647949                        | 1.106448  |         |
| H            | 3.382330  | 0.908131                        | 2.577851  |         |
| H            | 4.144669  | -0.693548                       | 2.279315  |         |
| H            | -1.663310 | -4.098242                       | -0.000077 |         |
| H            | -0.683323 | -2.949355                       | -0.932389 |         |
| H            | -0.838782 | -2.752143                       | 0.805261  |         |
| H            | -5.246382 | 1.538865                        | -0.250146 |         |
| H            | -3.682216 | 1.771589                        | 0.573246  |         |
| H            | -3.769560 | 1.881548                        | -1.177760 |         |
| H            | -7.137736 | -2.601327                       | -1.077011 |         |
| H            | -6.251078 | -3.152860                       | -2.509379 |         |
| H            | -6.180808 | -4.107295                       | -1.017165 |         |
| H            | -1.016817 | 6.499415                        | -0.080273 |         |
| H            | 0.094896  | 6.056053                        | -1.395470 |         |
| H            | -1.643383 | 6.152585                        | -1.714120 |         |
| H            | -0.104943 | 1.754951                        | 2.832927  |         |
| H            | -0.963875 | 3.268974                        | 3.127755  |         |
| H            | -1.872431 | 1.760382                        | 2.937669  |         |
| H            | -1.634722 | 1.636094                        | -3.347948 |         |
| H            | -0.322598 | 0.657892                        | -2.660839 |         |
| H            | -1.993951 | 0.268750                        | -2.255418 |         |
| F            | -0.169542 | -0.566765                       | -0.496186 |         |
| N            | 2.179978  | -1.859079                       | 3.546944  |         |
| O            | 2.701609  | -2.597565                       | 2.707310  |         |
| O            | 2.722218  | -1.400125                       | 4.548046  |         |
| O            | 0.925286  | -3.490032                       | 5.397372  |         |
| O            | -0.213601 | -2.013502                       | 6.558147  |         |
| N            | 0.212164  | -2.494039                       | 5.508872  |         |
| N            | -2.544405 | -1.889463                       | 5.005360  |         |
| O            | -2.624662 | -3.083033                       | 5.282748  |         |
| O            | -3.237558 | -0.980395                       | 5.455489  |         |
| N            | -3.337693 | -0.685139                       | 2.627587  |         |
| O            | -4.042298 | -1.695229                       | 2.646578  |         |
| O            | -3.739030 | 0.474582                        | 2.568425  |         |
| Complex      |           | 6OH <sup>+</sup> F <sup>-</sup> |           |         |
| Atom         | X         | Y                               | Z         |         |

| ARTICLE |           |           | Journal Name |
|---------|-----------|-----------|--------------|
| C       | 0.140502  | -1.369523 | 4.380700     |
| C       | -1.220276 | -1.259990 | 4.104175     |
| C       | 1.075140  | -1.082245 | 3.376874     |
| C       | -1.650251 | -0.840247 | 2.836457     |
| C       | 0.620400  | -0.655132 | 2.119838     |
| C       | -0.752592 | -0.505165 | 1.818164     |
| Sb      | 2.056470  | -0.342396 | 0.584768     |
| B       | -1.241118 | -0.005755 | 0.339812     |
| C       | 2.063281  | 1.486843  | -0.491944    |
| C       | 2.320460  | 1.491389  | -1.866759    |
| C       | 1.948435  | 2.686340  | 0.218395     |
| C       | 2.445300  | 2.712748  | -2.537580    |
| C       | 2.078788  | 3.900515  | -0.458360    |
| C       | 2.325896  | 3.914559  | -1.834718    |
| C       | 2.430794  | -1.985759 | -0.720795    |
| C       | 1.801369  | -2.106947 | -1.967124    |
| C       | 3.361391  | -2.946808 | -0.304626    |
| C       | 2.113772  | -3.187857 | -2.796761    |
| C       | 3.656375  | -4.034893 | -1.133205    |
| C       | 3.036459  | -4.153257 | -2.380476    |
| C       | -2.606666 | -0.808256 | -0.129387    |
| C       | -3.887397 | -0.199590 | -0.284563    |
| C       | -2.531377 | -2.212786 | -0.388173    |
| C       | -4.989867 | -0.950925 | -0.730913    |
| C       | -3.653044 | -2.922322 | -0.836906    |
| C       | -4.895283 | -2.309453 | -1.034321    |
| C       | -1.228637 | 1.610360  | 0.081684     |
| C       | -1.207017 | 2.059797  | -1.270159    |
| C       | -1.231689 | 2.611435  | 1.086648     |
| C       | -1.170687 | 3.425564  | -1.576218    |
| C       | -1.196233 | 3.973060  | 0.741573     |
| C       | -1.154730 | 4.408259  | -0.583581    |
| C       | 3.997801  | -0.106125 | 1.477836     |
| C       | -1.265102 | -3.016308 | -0.187290    |
| C       | -4.168089 | 1.253746  | 0.039524     |
| C       | -6.080417 | -3.088859 | -1.544866    |
| C       | -1.057854 | 5.870196  | -0.933912    |
| C       | -1.300839 | 2.309920  | 2.568335     |
| C       | -1.239198 | 1.111268  | -2.448086    |
| H       | 2.429680  | 0.557817  | -2.420624    |
| H       | 1.739884  | 2.684120  | 1.289264     |
| H       | 2.636959  | 2.720755  | -3.612117    |
| H       | 1.974641  | 4.837154  | 0.090879     |
| H       | 2.420219  | 4.865836  | -2.361274    |
| H       | 1.058247  | -1.376623 | -2.283120    |
| H       | 3.858544  | -2.863325 | 0.663112     |
| H       | 1.626927  | -3.277582 | -3.769472    |
| H       | 4.373496  | -4.787577 | -0.801269    |
| H       | 3.271275  | -4.999435 | -3.028414    |
| H       | -5.957567 | -0.450079 | -0.833834    |
| H       | -3.555287 | -3.997090 | -1.021790    |
| H       | -1.153624 | 3.730024  | -2.627885    |
| H       | -1.196521 | 4.718787  | 1.543395     |
| H       | 4.683195  | 0.149822  | 0.660307     |
| H       | 3.938173  | 0.717843  | 2.198089     |
| H       | 4.311108  | -1.019287 | 1.989779     |
| H       | -1.503502 | -4.087483 | -0.119663    |
| H       | -0.561427 | -2.877146 | -1.019848    |
| H       | -0.728791 | -2.715715 | 0.721841     |
| H       | -5.253520 | 1.420329  | 0.092650     |
| H       | -3.724524 | 1.561398  | 0.995053     |
| H       | -3.753132 | 1.929765  | -0.721709    |

| Journal Name |           |           | ARTICLE   |
|--------------|-----------|-----------|-----------|
| H            | -7.021971 | -2.554014 | -1.357251 |
| H            | -6.004229 | -3.255777 | -2.632005 |
| H            | -6.143489 | -4.080081 | -1.071469 |
| H            | -1.333494 | 6.507577  | -0.081666 |
| H            | -0.027608 | 6.134797  | -1.226856 |
| H            | -1.707894 | 6.127254  | -1.783953 |
| H            | -0.410608 | 1.771212  | 2.923953  |
| H            | -1.381813 | 3.246651  | 3.138485  |
| H            | -2.169322 | 1.685258  | 2.823640  |
| H            | -1.602338 | 1.631897  | -3.346315 |
| H            | -0.232005 | 0.725906  | -2.668306 |
| H            | -1.879799 | 0.239671  | -2.261133 |
| F            | -0.116991 | -0.517619 | -0.552630 |
| O            | -3.026643 | -0.750946 | 2.723224  |
| H            | -3.239546 | -0.769952 | 1.753996  |
| O            | -2.108621 | -1.584633 | 5.096600  |
| H            | -3.003946 | -1.499068 | 4.705856  |
| O            | 0.622336  | -1.793244 | 5.600214  |
| H            | -0.137385 | -2.024780 | 6.168828  |
| O            | 2.411765  | -1.255289 | 3.646848  |
| H            | 2.485785  | -1.591514 | 4.562559  |

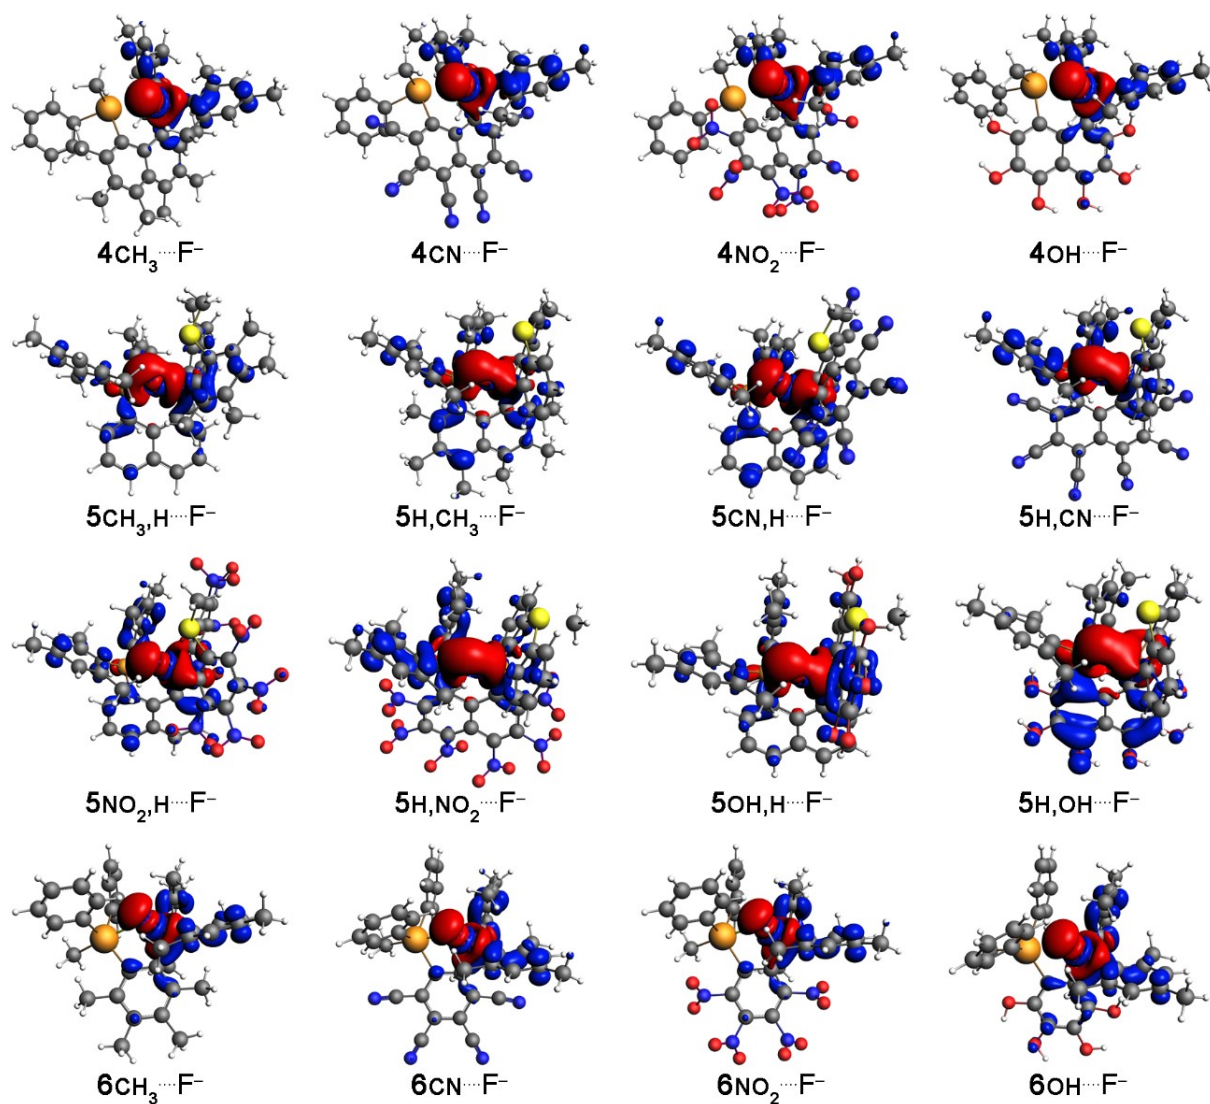

**Figure S1.** The first density deformation channels surface plots,  $\Delta\rho_1$ , for the structures designed from the (4–6) $\cdots\text{F}^-$  complexes. Red and blue regions indicate the electronic density outflow and inflow, respectively. The isovalue used to represent these surfaces is 0.001 a.u. Atoms color code: H = white; C = gray; N = blue; O = red; S = yellow; Sb = tangerine; and Te = orange.



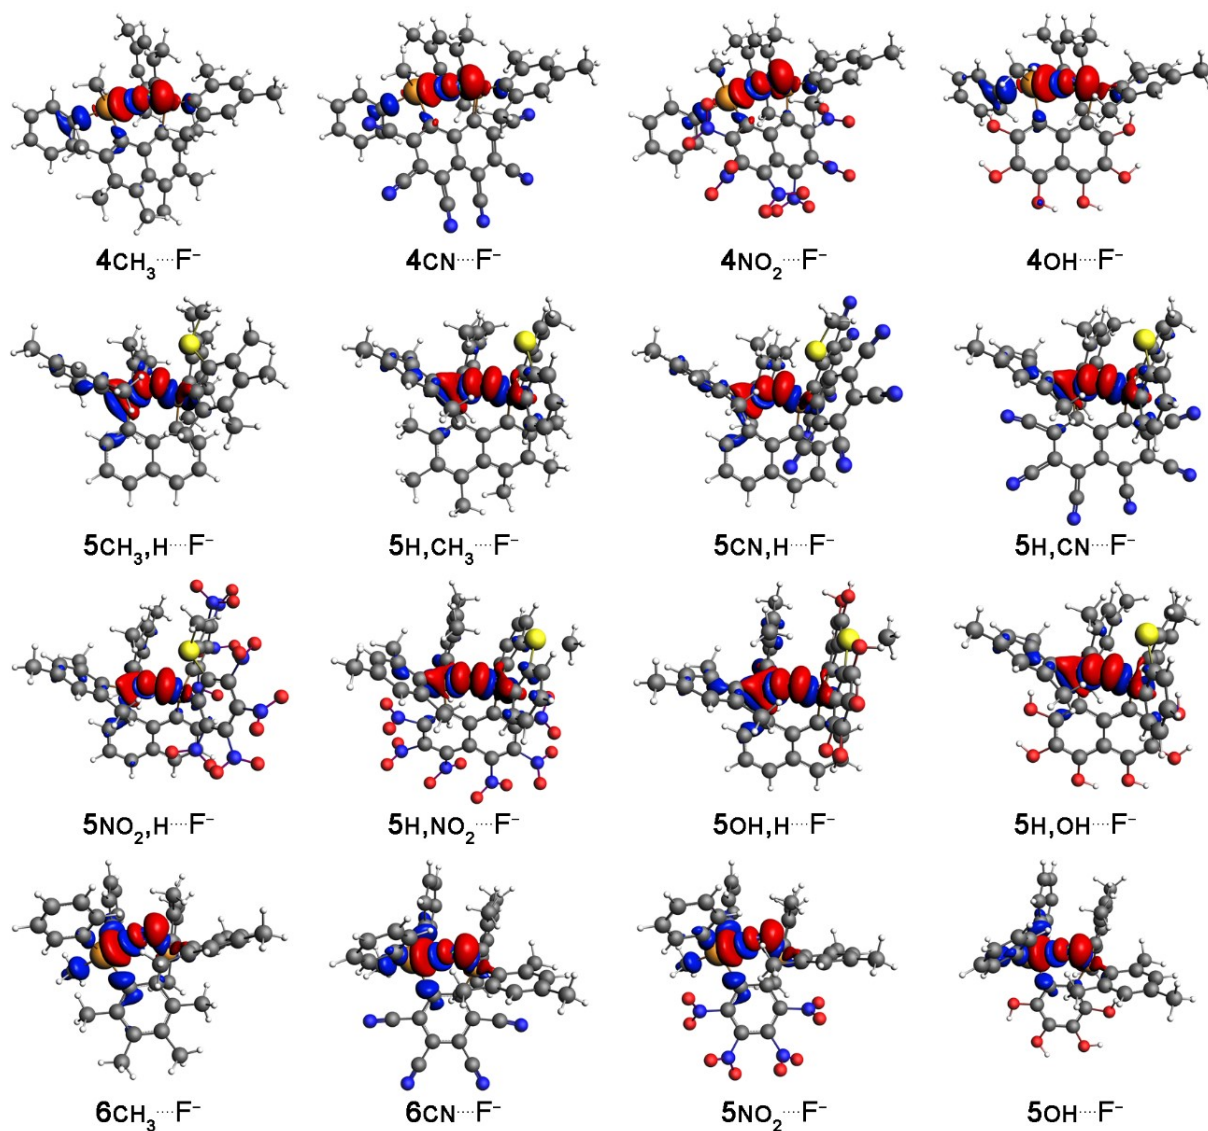

**Figure S2.** The second density deformation channels surface plots,  $\Delta\rho_2$ , for the structures designed from the (4–6)F<sup>-</sup> complexes. Red and blue regions indicate the electronic density outflow and inflow, respectively. The isovalue used to represent these surfaces is 0.001 a.u. Atoms color code: H = white; C = gray; N = blue; O = red; S = yellow; Sb = tangerine; and Te = orange.

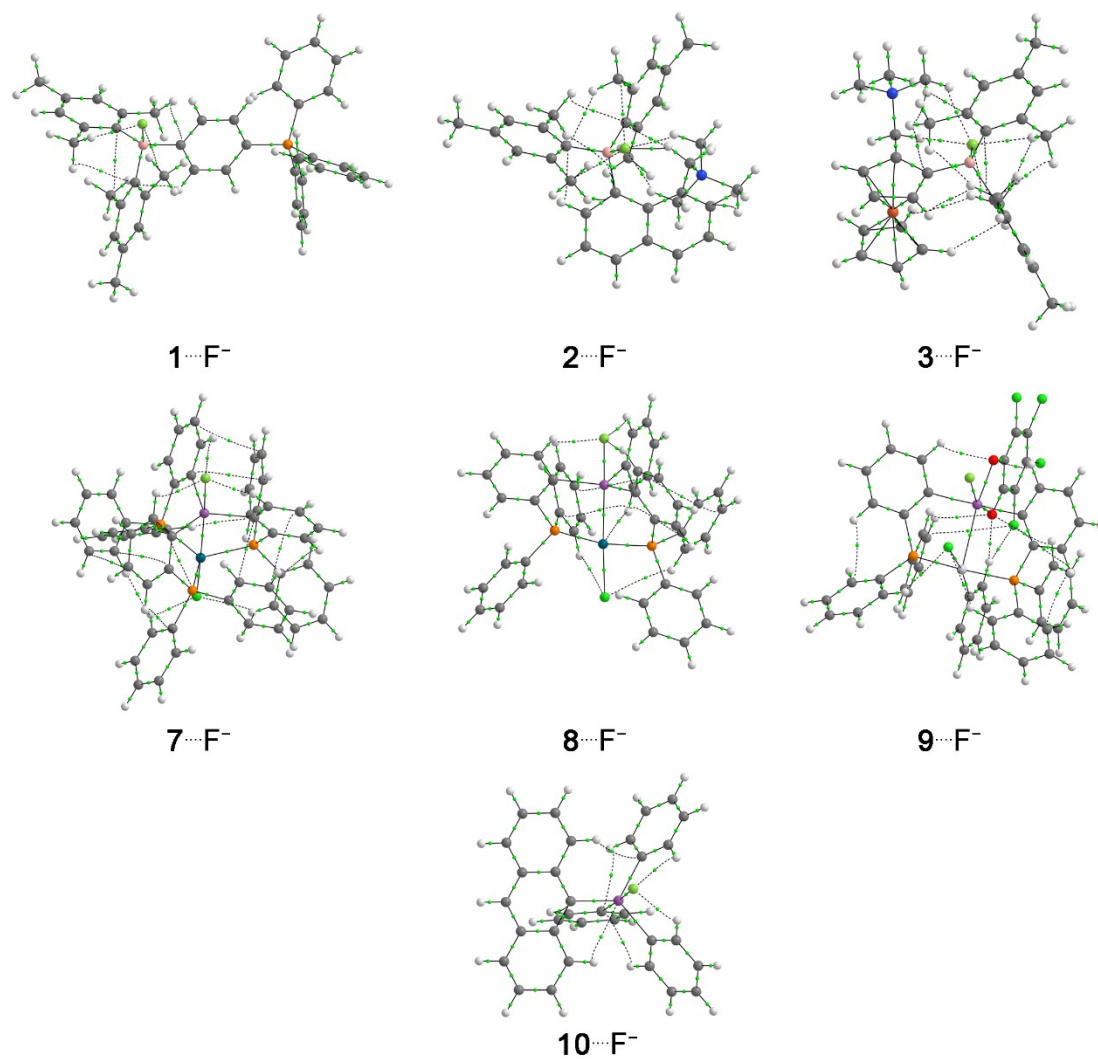

**Figure S3.** Topological map containing the bond paths (continuous or dashed lines connecting the cores) and bond critical points (small light green points), for the complexes (**1–3** and **7–10**)... $F^-$ . Atoms color code: H = white; B = pink; C = gray; N = blue; O = red; F = green; P = orange; Cl = light green; Fe = brown; Pd = turquoise; Sb = purple; and Pt = silver.

**Table S2.** Ratio between the kinetic energy density,  $G_b$ , and potential energy density,  $V_b$ ,  $-G_b/V_b$ , and electron density,  $\rho_b$ , at BCPs related to interactions between the receptors **1–10** and the anion  $F^-$ . The values of all the parameters are in a.u.

| Complex             | BCP                       | $-G_b/V_b$ | $\rho_b$ |
|---------------------|---------------------------|------------|----------|
| <b>1</b> ... $F^-$  | B... $F^-$                | 0.734      | 0.129    |
|                     | C-H... $F^-$              | 1.271      | 0.015    |
|                     | C... $F^-$                | 1.267      | 0.014    |
| <b>2</b> ... $F^-$  | B... $F^-$                | 0.736      | 0.123    |
|                     | C-H... $F^-$              | 1.117      | 0.027    |
|                     | C-H... $F^-$              | 1.233      | 0.019    |
|                     | C-H... $F^-$              | 1.307      | 0.012    |
|                     | C... $F^-$                | 1.265      | 0.014    |
|                     | C... $F^-$                | 1.253      | 0.015    |
| <b>3</b> ... $F^-$  | B... $F^-$                | 0.735      | 0.128    |
|                     | C-H... $F^-$              | 1.239      | 0.016    |
|                     | C-H... $F^-$              | 1.243      | 0.017    |
|                     | C-H... $F^-$              | 1.293      | 0.013    |
|                     | C-H... $F^-$              | 1.256      | 0.015    |
| <b>4</b> ... $F^-$  | B... $F^-$                | 0.739      | 0.111    |
|                     | Te... $F^-$               | 0.914      | 0.039    |
|                     | C-H... $F^-$              | 1.285      | 0.012    |
|                     | C... $F^-$                | 1.268      | 0.014    |
| <b>5</b> ... $F^-$  | B... $F^-$ <sup>[a]</sup> | 0.715      | 0.071    |
|                     | B... $F^-$ <sup>[b]</sup> | 0.751      | 0.102    |
|                     | C-H... $F^-$              | 1.280      | 0.015    |
|                     | C... $F^-$                | 1.278      | 0.014    |
| <b>6</b> ... $F^-$  | B... $F^-$                | 0.743      | 0.111    |
|                     | Sb... $F^-$               | 0.913      | 0.039    |
|                     | C-H... $F^-$              | 1.286      | 0.012    |
|                     | C... $F^-$                | 1.265      | 0.014    |
| <b>7</b> ... $F^-$  | Sb... $F^-$               | 0.800      | 0.091    |
|                     | C-H... $F^-$              | 1.287      | 0.012    |
|                     | C-H... $F^-$              | 1.277      | 0.013    |
|                     | C-H... $F^-$              | 1.269      | 0.014    |
| <b>8</b> ... $F^-$  | Sb... $F^-$               | 0.802      | 0.087    |
|                     | C-H... $F^-$              | 1.263      | 0.015    |
|                     | C-H... $F^-$              | 1.263      | 0.015    |
|                     | C-H... $F^-$              | 1.261      | 0.015    |
| <b>9</b> ... $F^-$  | Sb... $F^-$               | 0.792      | 0.103    |
|                     | Sb... $F^-$               | 0.798      | 0.086    |
| <b>10</b> ... $F^-$ | C-H... $F^-$              | 1.256      | 0.015    |
|                     | C-H... $F^-$              | 1.278      | 0.012    |

<sup>[a]</sup> Interaction related to boron atom localized in the left position in the respective structure of the Scheme 1; and <sup>[b]</sup> Interaction related to boron atom localized in the right position in the respective structure of the Scheme 1.

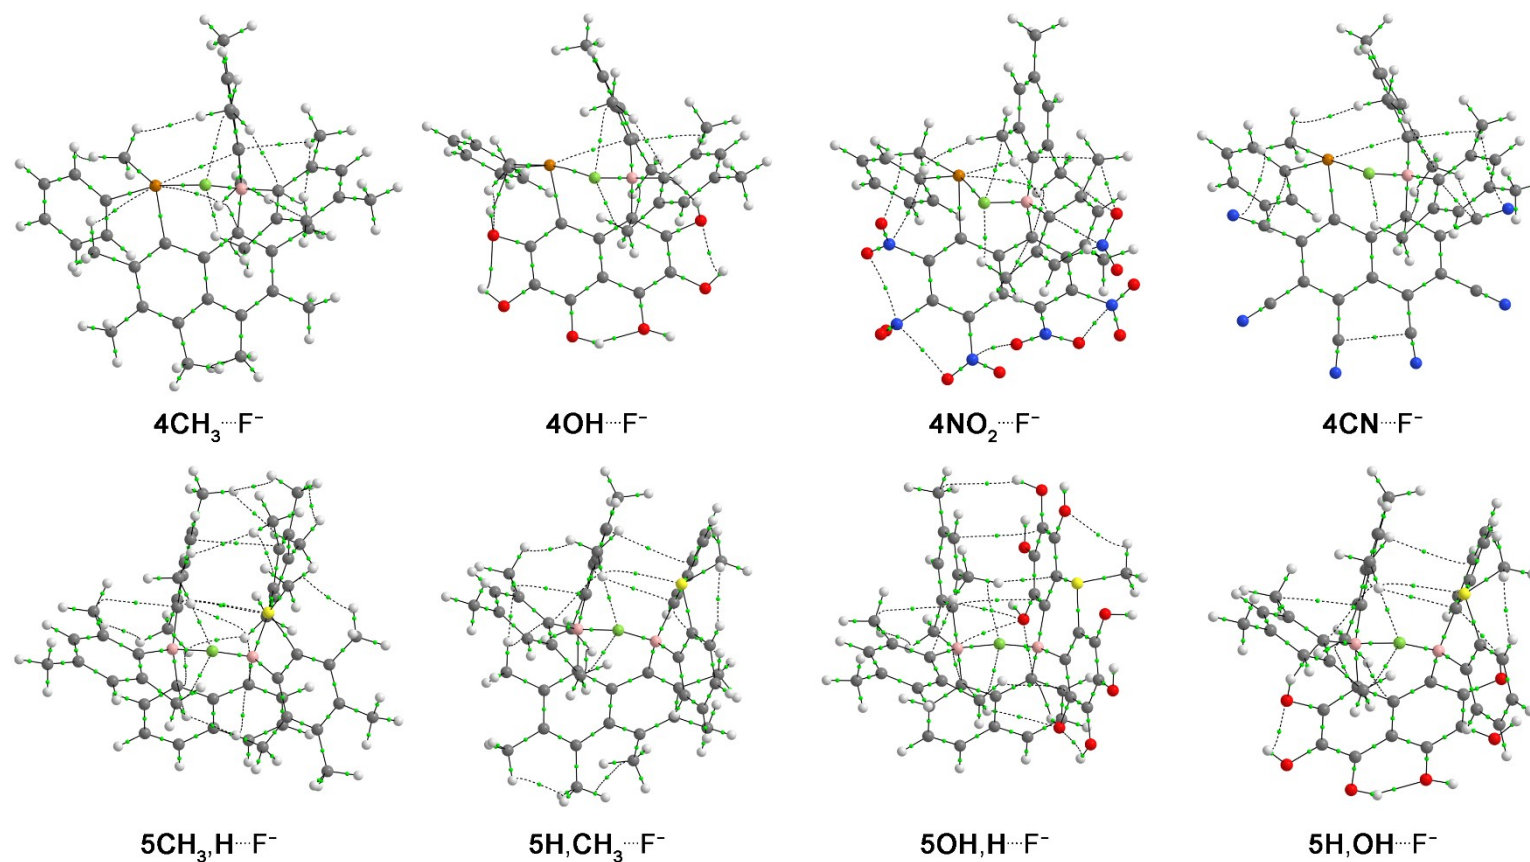

**Figure S4.** Topological map containing the bond paths (continuous or dashed lines connecting the cores) and bond critical points (small light green points), for the complexes  $4\text{CH}_3\cdots\text{F}^-$ ,  $4\text{OH}\cdots\text{F}^-$ ,  $4\text{NO}_2\cdots\text{F}^-$ ,  $4\text{CN}\cdots\text{F}^-$ ,  $5\text{CH}_3\cdots\text{H}\cdots\text{F}^-$ ,  $5\text{H}\cdots\text{CH}_3\cdots\text{F}^-$ ,  $5\text{OH}\cdots\text{H}\cdots\text{F}^-$ , and  $5\text{H}\cdots\text{OH}\cdots\text{F}^-$ . Atoms color code: H = white; B = pink; C = gray; N = blue; O = red; F = green; S = yellow; Cl = light green; and Te = brown.

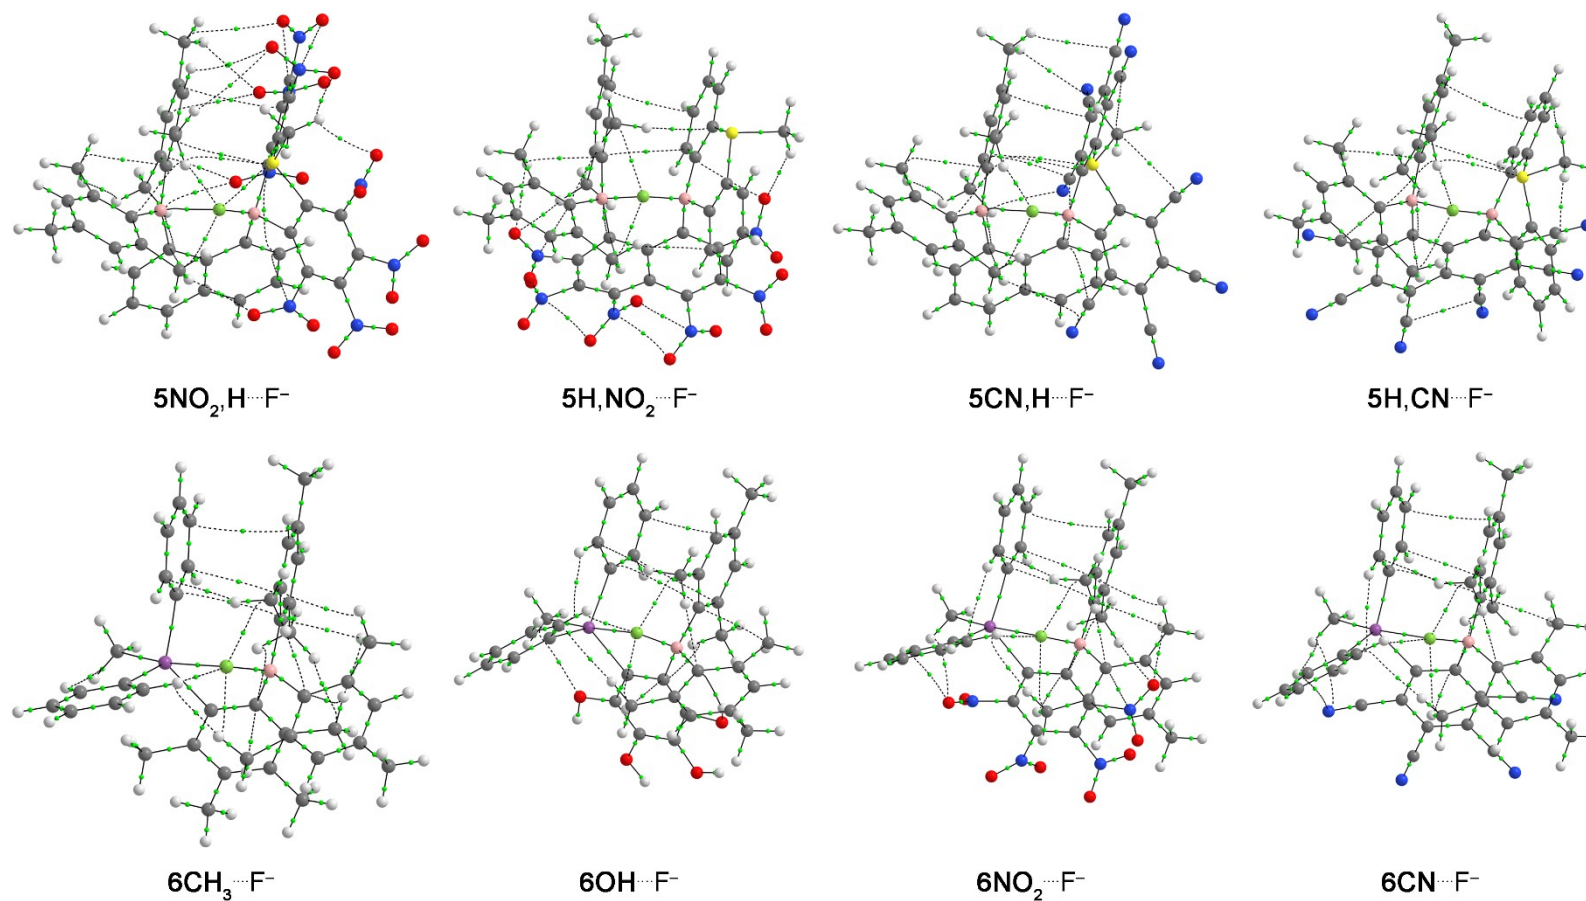

**Figure S5.** Topological map containing the bond paths (continuous or dashed lines connecting the cores) and bond critical points (small light green points), for the complexes  $5\text{NO}_2\cdots\text{H}\cdots\text{F}^-$ ,  $5\text{H}\cdots\text{NO}_2\cdots\text{F}^-$ ,  $5\text{CN}\cdots\text{H}\cdots\text{F}^-$ ,  $5\text{H}\cdots\text{CN}\cdots\text{F}^-$ ,  $6\text{CH}_3\cdots\text{F}^-$ ,  $6\text{OH}\cdots\text{F}^-$ ,  $6\text{NO}_2\cdots\text{F}^-$ , and  $6\text{CN}\cdots\text{F}^-$ . Atoms color code: H = white; B = pink; C = gray; N = blue; O = red; F = green; S = yellow; Cl = light green; and Sb = purple.

## ARTICLE

**Table S3.** Ratio between the kinetic energy density,  $G_b$ , and potential energy density,  $V_b$ ,  $-G_b/V_b$ , and electron density,  $\rho_b$ , at BCPs related to interactions between the designed receptors from the compound **4** and the anion  $F^-$ . The values of all the parameters are in a.u.

| Complex                          | BCP          | $-G_b/V_b$ | $\rho_b$ |
|----------------------------------|--------------|------------|----------|
| <b>4CH<sub>3</sub></b> ... $F^-$ | B... $F^-$   | 0.737      | 0.114    |
|                                  | Te... $F^-$  | 0.942      | 0.035    |
|                                  | C-H... $F^-$ | 1.244      | 0.017    |
|                                  | C... $F^-$   | 1.276      | 0.013    |
| <b>4OH</b> ... $F^-$             | B... $F^-$   | 0.737      | 0.114    |
|                                  | Te... $F^-$  | 0.921      | 0.038    |
|                                  | C... $F^-$   | 1.285      | 0.012    |
|                                  | C... $F^-$   | 1.283      | 0.013    |
| <b>4NO<sub>2</sub></b> ... $F^-$ | B... $F^-$   | 0.734      | 0.122    |
|                                  | Te... $F^-$  | 1.005      | 0.029    |
|                                  | C-H... $F^-$ | 1.236      | 0.018    |
|                                  | C... $F^-$   | 1.289      | 0.012    |
| <b>4CN</b> ... $F^-$             | B... $F^-$   | 0.734      | 0.120    |
|                                  | Te... $F^-$  | 1.011      | 0.028    |
|                                  | C-H... $F^-$ | 1.249      | 0.017    |

**Table S4.** Ratio between the kinetic energy density,  $G_b$ , and potential energy density,  $V_b$ ,  $-G_b/V_b$ , and electron density,  $\rho_b$ , at BCPs related to interactions between the designed receptors from the compound **5** and the anion  $F^-$ . The values of all the parameters are in a.u.

| Complex                                    | BCP                    | $-G_b/V_b$ | $\rho_b$ |
|--------------------------------------------|------------------------|------------|----------|
| <b>5CH<sub>3</sub>,H</b> ...F <sup>-</sup> | B...F <sup>-</sup> [a] | 0.732      | 0.075    |
|                                            | B...F <sup>-</sup> [b] | 0.748      | 0.101    |
|                                            | C-H...F <sup>-</sup>   | 1.274      | 0.015    |
|                                            | C...F <sup>-</sup>     | 1.271      | 0.015    |
| <b>5H,CH<sub>3</sub></b> ...F <sup>-</sup> | B...F <sup>-</sup> [a] | 0.731      | 0.072    |
|                                            | B...F <sup>-</sup> [b] | 0.755      | 0.105    |
|                                            | C-H...F <sup>-</sup>   | 1.260      | 0.016    |
|                                            | C...F <sup>-</sup>     | 1.286      | 0.014    |
| <b>5OH,H</b> ...F <sup>-</sup>             | B...F <sup>-</sup> [a] | 0.746      | 0.083    |
|                                            | B...F <sup>-</sup> [b] | 0.735      | 0.092    |
|                                            | C-H...F <sup>-</sup>   | 1.301      | 0.012    |
|                                            | C...F <sup>-</sup>     | 1.284      | 0.014    |
| <b>5H,OH</b> ...F <sup>-</sup>             | B...F <sup>-</sup> [a] | 0.705      | 0.070    |
|                                            | B...F <sup>-</sup> [b] | 0.753      | 0.107    |
|                                            | C-H...F <sup>-</sup>   | 1.264      | 0.016    |
|                                            | C...F <sup>-</sup>     | 1.285      | 0.014    |
| <b>5NO<sub>2</sub>,H</b> ...F <sup>-</sup> | B...F <sup>-</sup> [a] | 0.828      | 0.034    |
|                                            | B...F <sup>-</sup> [b] | 0.739      | 0.142    |
|                                            | C-H...F <sup>-</sup>   | 1.292      | 0.014    |
|                                            | C...F <sup>-</sup>     | 1.306      | 0.012    |
|                                            | S...F <sup>-</sup>     | 1.143      | 0.021    |
| <b>5H,NO<sub>2</sub></b> ...F <sup>-</sup> | B...F <sup>-</sup> [a] | 0.742      | 0.084    |
|                                            | B...F <sup>-</sup> [b] | 0.746      | 0.102    |
|                                            | C...F <sup>-</sup>     | 1.305      | 0.012    |
|                                            | C...F <sup>-</sup>     | 1.303      | 0.012    |
| <b>5CN,H</b> ...F <sup>-</sup>             | B...F <sup>-</sup> [a] | 0.712      | 0.043    |
|                                            | B...F <sup>-</sup> [b] | 0.743      | 0.133    |
|                                            | C-H...F <sup>-</sup>   | 1.266      | 0.016    |
|                                            | C...F <sup>-</sup>     | 1.293      | 0.013    |
| <b>5H,CN</b> ...F <sup>-</sup>             | B...F <sup>-</sup> [a] | 0.735      | 0.077    |
|                                            | B...F <sup>-</sup> [b] | 0.752      | 0.108    |
|                                            | C-H...F <sup>-</sup>   | 1.257      | 0.016    |
|                                            | C...F <sup>-</sup>     | 1.291      | 0.013    |

[a] Interaction related to boron atom localized in the left position in the respective structure of the Scheme 2; and [b] Interaction related to boron atom localized in the right position in the respective structure of the Scheme 2.

**Table S5.** Ratio between the kinetic energy density,  $G_b$ , and potential energy density,  $V_b$ ,  $-G_b/V_b$ , and electron density,  $\rho_b$ , at BCPs related to interactions between the designed receptors from the compound **6** and the anion  $F^-$ . The values of all the parameters are in a.u.

| Complex                          | BCP          | $-G_b/V_b$ | $\rho_b$ |
|----------------------------------|--------------|------------|----------|
| <b>6CH<sub>3</sub></b> ... $F^-$ | B... $F^-$   | 0.743      | 0.105    |
|                                  | Sb... $F^-$  | 0.895      | 0.042    |
|                                  | C-H... $F^-$ | 1.274      | 0.015    |
|                                  | C-H... $F^-$ | 1.241      | 0.016    |
|                                  | C... $F^-$   | 1.283      | 0.013    |
| <b>6OH</b> ... $F^-$             | B... $F^-$   | 0.745      | 0.115    |
|                                  | Sb... $F^-$  | 0.915      | 0.039    |
|                                  | C-H... $F^-$ | 1.283      | 0.014    |
|                                  | C... $F^-$   | 1.282      | 0.013    |
|                                  | C... $F^-$   | 1.281      | 0.013    |
| <b>6NO<sub>2</sub></b> ... $F^-$ | B... $F^-$   | 0.742      | 0.111    |
|                                  | Sb... $F^-$  | 0.892      | 0.043    |
|                                  | C-H... $F^-$ | 1.275      | 0.015    |
|                                  | C... $F^-$   | 1.286      | 0.012    |
|                                  | C... $F^-$   | 1.300      | 0.012    |
| <b>6CN</b> ... $F^-$             | B... $F^-$   | 0.743      | 0.112    |
|                                  | Sb... $F^-$  | 0.902      | 0.041    |
|                                  | C-H... $F^-$ | 1.291      | 0.013    |
|                                  | C... $F^-$   | 1.291      | 0.013    |
|                                  | C... $F^-$   | 1.283      | 0.013    |
