# Supplementary figures and images for: Biofillm: multicellular living of the unicellular bacteria
Source: Royal Society of Chemistry journal article supplement (doi:10.1039/d1cp02514g), 2012-01-01

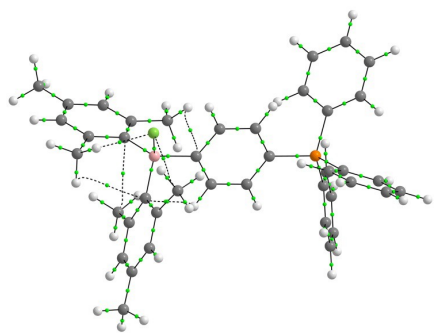

**1**···F<sup>-</sup>

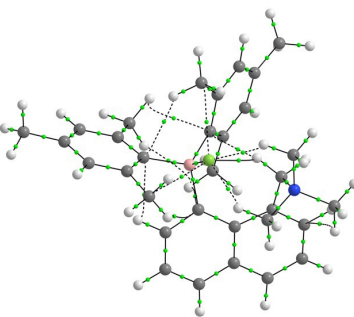

**2**···F<sup>-</sup>

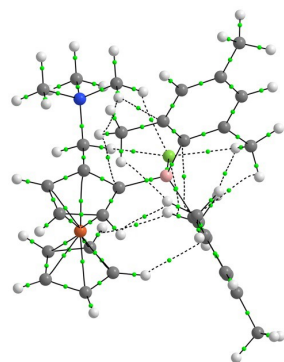

**3**···F<sup>-</sup>

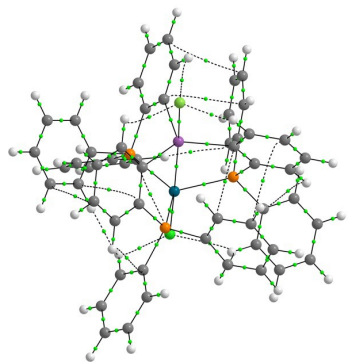

**7**···F<sup>-</sup>

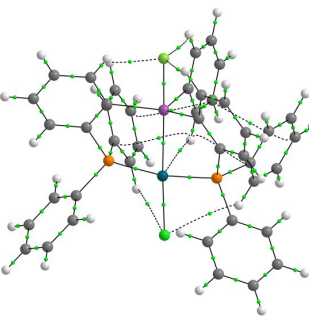

**8**···F<sup>-</sup>

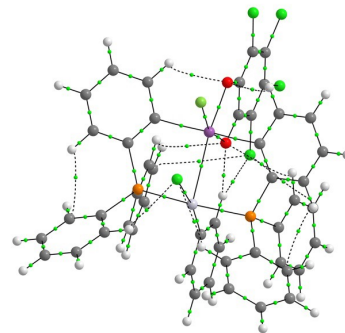

**9**···F<sup>-</sup>

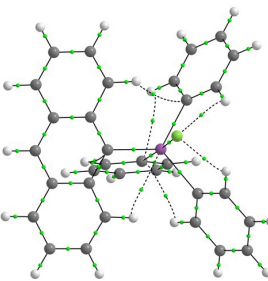

**10**···F<sup>-</sup>

Supplement: d1cp02514g3.pdf [file d1cp02514g3.pdf]
